1 **Daughterless, the *Drosophila* orthologue of TCF4, is required for**  
2 **associative learning and maintenance of synaptic proteome**

3 **Laura Tamberg<sup>1</sup>, Mariliis Jaago<sup>1</sup>, Kristi Säälük<sup>1</sup>, Anastassia Shubina<sup>1</sup>, Carl Sander Kiir<sup>1</sup>,**  
4 **Alex Sirp<sup>1</sup>, Tõnis Timmusk<sup>1</sup>, Mari Palgi<sup>1</sup>**

5 <sup>1</sup> Department of Chemistry and Biotechnology, Tallinn University of Technology, Akadeemia  
6 tee 15 Tallinn, Estonia, 12618

7 **Corresponding author:** Mari Palgi [mari.palgi@taltech.ee](mailto:mari.palgi@taltech.ee) [https://orcid.org/0000-0001-6142-](https://orcid.org/0000-0001-6142-6142)  
8 6142

9

10 **Key words:** TCF4, Daughterless, Pitt-Hopkins syndrome, intellectual disability, *Drosophila*  
11 *melanogaster*, appetitive associative learning

12

## 13 **Summary statement**

14 Human TCF4, a bHLH transcription factor, is associated with intellectual disability and  
15 schizophrenia. Here we propose a *Drosophila* model for human disease studies using TCF4  
16 orthologue in fruit fly, Daughterless.

17

## 18 **Abstract**

19 Mammalian Transcription Factor 4 (TCF4) has been linked to schizophrenia and intellectual  
20 disabilities like Pitt-Hopkins syndrome (PTHS). Here we show that similarly to mammalian  
21 TCF4, fruit fly orthologue Daughterless (Da) is expressed in the *Drosophila* brain structures  
22 associated with learning and memory, the mushroom bodies. Furthermore, silencing of *da* in  
23 mushroom body neurons impairs appetitive associative learning of the larvae and leads to  
24 decreased levels of the synaptic proteins Synapsin (Syn) and discs large 1 (*dlg1*) suggesting  
25 the involvement of Da in memory formation. Here we demonstrate that *Syn* and *dlg1* are  
26 direct target genes of Da in adult *Drosophila* heads, since Da binds to the regulatory regions  
27 of these genes and the modulation of Da levels alter the levels of *Syn* and *dlg1* mRNA.  
28 Silencing of *da* also affects negative geotaxis of the adult flies suggesting the impairment of  
29 locomotor function. Overall, our findings suggest that Da regulates *Drosophila* larval memory  
30 and adult negative geotaxis possibly via its synaptic target genes *Syn* and *dlg1*. These  
31 behavioural phenotypes can be further used as a PTHS model to screen for therapeutics.

32

## 33 **Introduction**

34 Transcription Factor 4 (TCF4, also known as ITF2, E2-2, SEF2 etc.) belongs to the family of  
35 class I basic helix-loop-helix (bHLH) transcription factors, also called E-proteins (Murre et al.,  
36 1994). The E-proteins bind to the DNA Ephrussi box (E-box) sequence CANNTG as  
37 homodimers or heterodimers with class II bHLH transcription factors (Cabrera and Alonso,  
38 1991). TCF4, Transcription factor 4, should be distinguished from T cell factor 4, also called  
39 TCF4 with official name TCF7L2, interacting with  $\beta$ -catenin and participating in WNT  
40 signalling pathway. TCF4 is essential for a range of neurodevelopmental processes including  
41 early spontaneous neuronal activity, cell survival, cell cycle regulation, neuronal migration  
42 and differentiation, synaptic plasticity, and memory formation (Chen et al., 2016; Crux et al.,  
43 2018; Forrest et al., 2013; Hill et al., 2017; Jung et al., 2018; Kennedy et al., 2016; Kepa et  
44 al., 2017; Li et al., 2019; Page et al., 2018; Thaxton et al., 2018). Genes involved in  
45 pathways including nervous system development, synaptic function and axon development  
46 are TCF4 targets (Forrest et al., 2018; Xia et al., 2018). Furthermore, TCF4 regulates the  
47 expression of ion channels  $Na_v1.8$  and  $K_v7.1$  (Ekins et al., 2019; Rannals et al., 2016).

48 Recent insights into the mechanisms of activation of TCF4 show that TCF4-dependent  
49 transcription in primary neurons is induced by neuronal activity via soluble adenylyl cyclase  
50 and protein kinase A (PKA) signalling (Sepp et al., 2017). In addition to nervous system,  
51 TCF4 has been shown to function in immune system in plasmacytoid dendritic cells  
52 development (Cisse et al., 2008; Grajkowska et al., 2017).

53 Deficits in TCF4 function are associated with several human diseases. TCF4  
54 haploinsufficiency causes Pitt-Hopkins syndrome (PTHS; OMIM #610954) (Amiel et al.,  
55 2007; Brockschmidt et al., 2007; Zweier et al., 2007). Patients with PTHS have severe  
56 intellectual disability, developmental delay, intermittent hyperventilation periods followed by  
57 apnea, and display distinct craniofacial features, reviewed in international consensus  
58 statement (Zollino et al., 2019). Currently there is no treatment for PTHS, but dissecting the  
59 functional consequences triggered by mutated TCF4 alleles could reveal attractive avenues  
60 for curative therapies for this disorder (reviewed in Rannals and Maher, 2017). Large scale  
61 genome wide association studies revealed SNPs in *TCF4* among the top risk loci for  
62 schizophrenia (SCZ) (Talkowski et al., 2012). Consistently, *TCF4* is involved in SCZ  
63 endophenotypes like neurocognition and sensorimotor gating (Lennertz et al., 2011a;  
64 Lennertz et al., 2011b; Quednow et al., 2011). Furthermore, many genes that are mutated in  
65 SCZ, autism spectrum disorder and intellectual disability patients are TCF4 target genes  
66 (Forrest et al., 2018). How deficits in TCF4 function translate into neurodevelopmental  
67 impairments and whether TCF4 plays an essential role in the mature nervous system is  
68 poorly understood.

69 We have previously demonstrated that TCF4 function can be modelled in *Drosophila*  
70 *melanogaster* using its orthologue and the sole E-protein in the fruit fly – Daughterless (Da).  
71 PTHS-associated mutations introduced to Da lead to similar consequences in the fruit fly as  
72 do the same mutations in TCF4 *in vitro* (Sepp et al., 2012; Tamberg et al., 2015).  
73 Furthermore, human TCF4 is capable of rescuing the lack of Da in the development of  
74 *Drosophila* embryonic nervous system (Tamberg et al., 2015). Da is involved in various  
75 developmental processes including sex determination, neurogenesis, myogenesis,  
76 oogenesis, intestinal stem cell maintenance, and development of the eye, trachea and  
77 salivary gland (Bardin et al., 2010; Bhattacharya and Baker, 2011; Brown et al., 1996;  
78 Castanon et al., 2001; Caudy et al., 1988; Cline, 1978; Cummings and Cronmiller, 1994;  
79 King-Jones et al., 1999; Massari and Murre, 2000; Smith et al., 2002; Wong et al., 2008). In  
80 the developing nervous system the role of Da is well established during neuronal  
81 specification as an obligatory heterodimerization partner for proneural class II bHLH  
82 transcription factors (Cabrera and Alonso, 1991; Powell et al., 2008). However, the functional  
83 role of Da following neurogenesis and nervous system maturation remains unknown.

84 Here we set out to characterize the expression of Da in the nervous system. To this end we  
85 created *Drosophila* lines where Da protein was endogenously tagged with either 3xFLAG or  
86 sfGFP epitope tags. We show that Da is broadly expressed in the larval CNS including  
87 mushroom body, the memory and learning centre of insects. To test whether Da is involved  
88 in learning and memory formation in the fruit fly we used appetitive associative learning  
89 paradigm in larvae (Michels et al., 2017). In this assay, reduced levels of Da in the  
90 mushroom body resulted in impaired learning and memory formation. Furthermore, silencing  
91 of *da* also resulted in decreased level of synaptic proteins Synapsin (Syn) and discs large 1  
92 (*dlg1*). Therefore, we suggest that the knockdown of *da* in mushroom body neurons  
93 combined with appetitive associative learning paradigm is further applicable to screen for  
94 potential therapeutics for the treatment of PTHS as well putative genetic interactors of Da  
95 and by proxy, TCF4. We also demonstrate that Da binds to several areas in the *dlg1* gene  
96 and to *Syn* promoter region in adult *Drosophila* heads and that overexpression of *da*  
97 increases *Syn* and *dlg1* mRNA levels in the adult heads. Therefore, we have shown for the  
98 first time that Da is required to sustain elements of the synaptic proteome in a mature  
99 nervous system positing a post-developmental function for Da and possibly TCF4.

100



## 101 **Results**

102

### 103 **Da is expressed in all developmental stages of the fruit fly**

104 While the expression of Da protein has been studied in fruit fly embryos, ovaries, larval optic  
105 lobes and imaginal discs using various anti-Da antibodies (Andrade-Zapata and Baonza,  
106 2014; Bhattacharya and Baker, 2011; Bhattacharya and Baker, 2012; Brown et al., 1996;  
107 Cronmiller and Cummings, 1993; Li and Baker, 2018; Tanaka-Matakatsu et al., 2014; Yasugi  
108 et al., 2014), its expression during adulthood remains largely uncharacterized. Therefore, we  
109 first aimed to study Da expression throughout the development of the fruit fly using  
110 immunoblot analysis. Since there are no commercial antibodies available that recognize Da  
111 we used the CRISPR/Cas9 system to create transgenic flies where Da is N-terminally tagged  
112 with 3xFLAG epitope. The resulting 3xFLAG-*da* line is maintained as homozygotes indicating  
113 that the tagged Da protein is functional as both *da* null mutations and *da* ubiquitous  
114 overexpression lead to embryonic lethality (Caudy et al., 1988; Giebel et al., 1997). We then  
115 characterized Da expression throughout development and in adult *Drosophila* heads of the  
116 3xFLAG-*da* line by performing immunoblot analysis with anti-FLAG antibodies. During  
117 development, we compared Da expression from embryonic to late pupal stages (Figure 1A  
118 and 1C). In adults, we analysed the Da levels from the heads of one, four and seven day old  
119 males and females (Figure 1B and 1D). We found Da to be expressed throughout  
120 development, with the highest levels detected in the 3rd instar larvae and early pupae while  
121 the lowest levels were observed in the 2nd instar larvae and late pupae (Figure 1C). During  
122 adulthood, Da expression was highest in the heads of one day old females and decreased  
123 thereafter in both males and females (Figure 1D). Also, one day old females had significantly  
124 higher Da expression in the head than one day old males (Figure 1D).

125

### 126 **3xFLAG-Da retains transactivational capability of Da in HEK293 cells**

127 In addition to 3xFLAG-*da* we also created sfGFP-*da* flies, where *da* is tagged with  
128 superfolder green fluorescent protein (sfGFP) in the same N-terminal position. To determine  
129 whether N-terminal tagging of Da proteins influences their transactivation capability we used  
130 the luciferase reporter system where the expression of the *luciferase* gene is controlled by E-  
131 boxes with a minimal promoter. For this, we cloned the 3xFLAG-tagged or sfGFP-tagged *da*  
132 from the genomes of the tagged lines into mammalian expression vector pcDNA3.1 and  
133 overexpressed these constructs in HEK293 cells. Luciferase reporter assay showed that  
134 compared to wild type (wt) Da the transactivational capability of 3xFLAG-Da was unchanged  
135 (Figure 2A). In contrast, the transactivational capability of sfGFP-Da was significantly

136 reduced (Figure 2A). Both *3xFLAG-da* and *sfGFP-da* constructs were expressed at equal  
137 levels as revealed by Western blot analysis (Figure 2B). This suggests that the 3xFLAG tag  
138 does not interfere with the transcriptional activity of Da.

139

#### 140 **Da is expressed in the brain structures associated with learning and memory**

141 Next we used the *3xFLAG-da* line to characterize expression of Da in the third instar larval  
142 brain. Da was expressed throughout the larval central nervous system (CNS), with stronger  
143 expression detected in the optic lobes (Figure 3A'' - 3C''). Since mutations in or deletion of  
144 one of the *TCF4* alleles lead to PTHS in humans and one of the hallmarks of PTHS is severe  
145 learning disability, and since *TCF4* is expressed in the adult mammalian hippocampus (Jung  
146 et al., 2018), we aimed to determine whether *TCF4* homolog Da is expressed in the  
147 mushroom body, the brain structure of insects responsible for learning and memory. For this,  
148 we deployed the UAS-Gal4 binary expression system (Brand and Perrimon, 1993) by  
149 combining the *3xFLAG-da* line with different driver lines with expression in the mushroom  
150 body. Resulting lines with *3xFLAG-da* and Gal4 were then combined with nuclear targeted  
151 UAS-nls-GFP. The GMR12B08-Gal4 line directed expression of Gal4 under the control of the  
152 single intron of *da* in most regions of the brain, including the mushroom body (Figure 3A).  
153 The two other drivers, 30Y-Gal4 and 201Y-Gal4, were both mushroom body-specific (Figure  
154 3B and 3C). We observed that the expression of *3xFLAG-Da* and GMR12B08>nlsGFP  
155 overlapped in many areas of the third instar larval brain (Figure 3A'), including the mushroom  
156 body (Figure 3B' and 3C'). In contrast, with 30Y-Gal4 and 201Y-Gal4, the mushroom body-  
157 specific driver lines, *3xFLAG-Da* showed partial co-expression in cells contributing to the  
158 third instar mushroom body. Thus, Da is expressed broadly in the CNS of 3rd instar larvae  
159 including mushroom body.

160

#### 161 **Silencing of *da* in the CNS leads to impaired memory of the larvae**

162 Heterozygous mutations in *TCF4*, the orthologue of *da*, lead to the PTHS syndrome,  
163 characterized by intellectual disability. This fact, and the observation that Da is expressed in  
164 the mushroom body implies that it might be involved in learning and memory in flies. To test  
165 this, we decided to take advantage of the ease of assaying appetitive associative learning  
166 and memory in the *Drosophila* larvae (Michels et al., 2017). However, this assay showed that  
167 learning ability is not impaired in *da* heterozygous mutants (Figure 4A), which could be due  
168 to *da* upregulation by autoregulation (Smith and Cronmiller, 2001). Since sfGFP-Da showed  
169 diminished transactivation capability *in vitro* (see above), we also tested homozygous sfGFP-  
170 *da* larvae, and found no impairment of learning ability (Figure 4A). Thus, we next investigated

171 whether knockdown of *da* with concurrent enhancement by Dicer-2 (*Dcr2*) expression (Dietzl  
172 et al., 2007) in the *Drosophila* CNS could impact memory and learning ability. To silence *da*  
173 in the CNS, we used several CNS-specific Gal4 lines. We found that appetitive associative  
174 learning was impaired in flies when using three drivers - GMR12B08-Gal4 (Figure 4B) and  
175 mushroom body specific lines 30Y-Gal4 (Figure 4C) and 201Y-Gal4 (Figure 4D). For control  
176 experiments, we used both the UAS-*da*<sup>RNAi</sup> line and the UAS-*Dcr2* driven by the CNS-specific  
177 Gal4 line. All of the transgenes (UAS-*Dcr2*, UAS-*da*<sup>RNAi</sup> and the driver Gal4) were  
178 homozygous for lowered learning ability in the case of GMR12B08-Gal4 and 201Y-Gal4  
179 (Figure 4B and 4D). In the case of UAS-*Dcr2*;3xFLAG-*da*,UAS-*da*<sup>RNAi</sup>;GMR12B08-Gal4 line  
180 (where 3xFLAG-*da*, UAS-*da*<sup>RNAi</sup> and GMR12B08-Gal4 were all in a homozygous state), Da  
181 levels in the larval brains were reduced by approximately 25% and 35% when compared to  
182 UAS-*Dcr2*;3xFLAG-*da*;GMR12B08-Gal4 and 3xFLAG-*da* larval brains, respectively (Suppl.  
183 figure 1A and 1B). We were unable to get homozygotes using mushroom body specific driver  
184 30Y-Gal4, possibly because knockdown of *da* with this driver in homozygous state is too  
185 strong and causes lethality. The learning ability of heterozygous larvae where *da* was  
186 silenced with the 30Y-Gal4 driver was notably but non-significantly impaired (Figure 4C).  
187 Larvae with impaired learning were also tested for their ability to taste and smell. All three  
188 lines showed preference towards fructose (Suppl. fig 2A) and amyl-acetate (Suppl. fig 2B)  
189 which indicates that the larvae can sense taste and smell and that their locomotor activity is  
190 not affected. Expressing only *Dcr2* under neuron-specific *elav-Gal4*, as a control for *da*  
191 silencing using the same driver, as such already caused learning impairment (data not  
192 shown), so learning ability of *elav-Gal4>Dcr2;da*<sup>RNAi</sup> larvae was nonsignificantly different from  
193 the control larvae *elav-Gal4>Dcr2*. Knockdown of *da* with glia-specific *repo-Gal4* did not alter  
194 learning and memory (data not shown). This suggests that for normal larval appetitive  
195 associative memory appropriate Da levels are needed in the brain structures specified by  
196 GMR12B08-Gal4, 30Y-Gal4 and 201Y-Gal4.

197

### 198 **Reduced level of Da in the larval CNS leads to decreased expression of synaptic** 199 **proteins Synapsin and discs large 1**

200 To investigate the putative mechanisms underlying learning and memory deficits in larvae  
201 with lowered levels of Da in the nervous system we used the driver line GMR12B08-Gal4 for  
202 silencing *da* since it had the broadest expression. For this we compared the expression  
203 levels of several known synaptic proteins in the 3rd instar larval brains under both *da*  
204 knockdown and overexpression conditions using the GMR12B08-Gal4 line (Figure 5). We  
205 quantified the expression levels of presynaptic protein bruchpilot (*brp*) (Figure 5A),  
206 postsynaptic protein discs large 1 (*dgl1*) (Figure 5B), presynaptic Synapsin (*Syn*) (Figure 5C)

207 which is important for learning and memory (Michels et al., 2005), and pan-neuronally  
208 expressed neuronal specific splicing factor embryonic lethal abnormal vision (elav) (Figure  
209 5D). We found that the levels of both dlg1 and Syn were reduced in 3rd instar larval brains  
210 with lower levels of Da (Figure 5B and 5C respectively). On the other hand, Da  
211 overexpression did not result in increased levels of these proteins. The levels of elav and brp  
212 were not significantly changed by knockdown or overexpression of *da* (Figure 5A and 5D,  
213 respectively). The finding that elav levels were not affected by Da suggests that reducing Da  
214 levels does not affect the number of neurons and the observed learning impairment might  
215 rather stem from lowered expression levels of synaptic proteins or, alternatively, from  
216 reduced number of synapses.

217

### 218 **Larval appetitive associative learning and memory test can be used for screening** 219 **drugs for PTHS treatment**

220 Our finding showing that larval appetitive associative learning and memory becomes  
221 impaired upon *da* silencing indicates that these fly lines could be used for modelling certain  
222 aspects of PTHS in *Drosophila* and testing potential drug candidates. For instance, various  
223 drugs or drug candidates could be tested for their capacity to rescue this behavioural  
224 impairment. Previously, it has been shown in our group that resveratrol improves  
225 transactivational capability of TCF4 in primary neuronal cultures (unpublished data). Also  
226 histone deacetylase inhibitor suberoylanilide hydroxamic acid (SAHA) has been shown to  
227 rescue memory impairment in the mouse model of PTHS (Kennedy et al., 2016). We  
228 therefore decided to test these two substances in the appetitive associative learning  
229 experiments. We observed that while the *da* knockdown larvae fed with 400  $\mu$ M resveratrol  
230 or 2  $\mu$ M SAHA showed increased associative memory, the rescue of the learning deficit was  
231 nonsignificant when compared to the controls (Figure 6A and 6B). Nevertheless, the  
232 impaired memory and learning of *Drosophila* larvae with specific *da* knockdown can be  
233 further used for screening pharmaceuticals for potential treatment of PTHS.

234

### 235 **Suppressing Da using 30Y-Gal4 leads to impaired negative geotaxis of adult flies**

236 Negative geotaxis has been successfully used to evaluate climbing ability indicative of motor  
237 dysfunction in the *Drosophila* model for Angelman syndrome that has similar symptoms to  
238 PTHS (Wu et al., 2008). Thus, we next used this assay to evaluate locomotion in adult flies  
239 where *da* knockdown had been achieved by the same drivers as used for the larval learning  
240 test. We found that negative geotaxis was unchanged in homozygotes where *da* knockdown  
241 had been achieved by the broad neuronal driver GMR12B08-Gal4 or mushroom body

242 specific driver 201Y-Gal4 (Figure 7A or 7C respectively). Interestingly, both female and male  
243 heterozygotes whose *da* was silenced by the 30Y-Gal4 driver had severely impaired  
244 negative geotaxis (Figure 7B). Next we visualized Da expression in the adult heads using  
245 3xFLAG-*da* line and confirmed its coexpression with 30Y-Gal4. Da was expressed widely in  
246 the adult *Drosophila* brain including the central brain and optic lobes (Figure 7D-D''), and  
247 coexpressed with 30Y-Gal4 in many cells in the mushroom body (Figure 7E-E''). 30Y-Gal4 is  
248 expressed in all mushroom body  $\alpha\beta$ ,  $\alpha'\beta'$  and  $\gamma$  lobes but 201Y-Gal4 is not expressed in  $\alpha'\beta'$   
249 Kenyon cells (Aso et al., 2009). It has previously been shown that when mushroom body  $\alpha'\beta'$   
250 Kenyon cells are activated then negative geotaxis is decreased (Sun et al., 2018). Silencing  
251 *da* by 201Y-Gal4 or GMR12B08-Gal4 did not cause decreased negative geotaxis probably  
252 because these drivers are not expressed in brain areas responsible for this behaviour, for  
253 example mushroom body  $\alpha'\beta'$  lobes. We also made an attempt to rescue this phenotype by  
254 administering resveratrol or SAHA either to larvae during development or to adult flies in the  
255 food substrate, but we could not get an improvement (data not shown).

256

### 257 ***Synapsin* and *discs large 1* are *Da* target genes**

258 Since *Syn* and *dlg1* levels were reduced in third instar larval brains when *da* was silenced  
259 and it has been shown that Da binds to both *Syn* and *dlg1* gene locus in embryonic stage 4-5  
260 (MacArthur et al., 2009) we sought to investigate whether Da binds to these areas in adult  
261 heads too. For this we used chromatin immunoprecipitation assay (ChIP) in 3xFLAG-*da* adult  
262 heads using anti-FLAG antibodies. As a control we used *white*<sup>1118</sup> fly line with no FLAG tag.  
263 For quantitative PCR (qPCR) from immunoprecipitated chromatin we designed primers to  
264 amplify *Syn* and *dlg1* gene areas containing E-boxes where Da binds in early embryos  
265 (MacArthur et al., 2009). In addition to previously shown Da binding site in *Syn* gene we also  
266 tested Da binding to *Syn* promoter region (Figure 8A). For *dlg1* we designed four primer  
267 pairs, since Da has been shown to bind four areas in that gene (Figure 8B) (MacArthur et al.,  
268 2009). As a negative control we used primers for *achaete* (Andrade-Zapata and Baonza,  
269 2014) since *achaete* is a proneural protein essential for neuronal development and should  
270 not be expressed in adult heads. As a positive control we used *peptidylglycine alpha-*  
271 *hydroxylating monooxygenase (PHM)* gene first intron where Da binds as a heterodimer with  
272 dimmed to activate transcription (Park et al., 2008). qPCR from immunoprecipitated  
273 chromatin using *Syn* primers resulted in enrichment of *Syn* promoter area (primer pair SynI)  
274 while previously reported Da binding site was not enriched in adult heads (primer pair SynII)  
275 (Figure 8C). All *dlg1* primers resulted in enrichment of previously reported Da binding areas  
276 (Figure 8C). This means that Da does not bind to the locus at the 3' end of *Syn* gene but  
277 binds to *Syn* promoter and all four *dlg1* gene areas that we selected in the adult heads. To

278 validate *Syn* and *dlg1* as *Da* target genes we carried out RT-qPCR analysis in adult  
279 *Drosophila* heads under *da* silencing and overexpression conditions. Although upon *da*  
280 silencing using *elav-Gal4* only *Syn* mRNA levels were decreased (Figure 8D), *da*  
281 overexpression using *elav-Gal4* increased mRNA levels of both *Syn* and *dlg1* (Figure 8E).  
282 This indicates that both *Syn* and *dlg1* are direct targets of *Da* in the *Drosophila* nervous  
283 system.

284



## 285 Discussion

286 Here we characterized the expression of *Da* in the *Drosophila melanogaster* larval and adult  
287 brain. *Da* was expressed in many areas of the brain including the mushroom body, which is  
288 the centre for learning and memory in the fruit fly and carries out a role that is comparable to  
289 the mammalian hippocampus. Orthologue of *da*, *TCF4* is expressed not only in the adult  
290 mammalian hippocampus but also in cortical and subcortical structures (Jung et al., 2018).

291 We created N-terminally tagged 3xFLAG-*da* and sfGFP-*da* fly strains. Both strains are  
292 homozygous viable and fertile, indicating that the overall functionality of *Da* *in vivo* is not  
293 altered by the molecular tag. However, in luciferase reporter assay in mammalian HEK293  
294 cells the sfGFP tag reduced transcription activation capability of *Da*. E-proteins activate  
295 transcription preferably as heterodimers with class II bHLH proteins, but can also act as  
296 homodimers (Cabrera and Alonso, 1991). In mammalian HEK293 cells *Da* has to activate  
297 transcription as a homodimer, since there are no heterodimerization partners like class II  
298 bHLH proteins expressed (Sepp et al., 2012). This suggests that sfGFP tag could interfere  
299 with *Da* function as a homodimer in the luciferase assay but not as a heterodimer *in vivo*. We  
300 also compared appetitive associative learning ability of 3xFLAG-*da* and sfGFP-*da* larvae and  
301 both of the lines had no learning impairment in this assay. This provides additional evidence  
302 that the 3xFLAG tag does not affect *Da* function and sfGFP tag reduces its transactivational  
303 capability probably by interfering with *Da* homodimer function.

304 Since *Da* is expressed in larval brain structures associated with learning and memory, and  
305 PTHS is caused by heterozygous mutations in *TCF4* we tested learning ability of *da*  
306 heterozygous mutant larvae. These larvae had no memory impairment, which could be due  
307 to *da* upregulation by autoregulation (Smith and Cronmiller, 2001). Learning and memory of  
308 larvae was impaired when *da* was knocked down in the mushroom body. *Da* mammalian  
309 orthologue *TCF4* is also associated with learning and memory, since when *TCF4* is  
310 downregulated in mouse hippocampus, pathways associated with neuronal plasticity are  
311 dysregulated (Kennedy et al., 2016) and silencing of *TCF4* in human pluripotent stem cell-  
312 derived neurons results in downregulated signalling pathways important for learning and  
313 memory (Hennig et al., 2017). In *TCF4* conditional knock-out mice the neurons in the cortex  
314 and hippocampus have reduced numbers of dendritic spines, which also suggests that  
315 synaptic plasticity is altered (Crux et al., 2018). In multiple PTHS mouse models spatial  
316 learning is defective probably through hippocampal NMDA receptor hyperfunction (Thaxton  
317 et al., 2018). Furthermore, many genes that code for synaptic proteins and have been linked  
318 to autism, intellectual disability, or psychiatric diseases are direct targets of *TCF4* (Forrest et  
319 al., 2018; Hennig et al., 2017).

320 Here we show that when *da* is silenced using driver with broad expression in the *Drosophila*  
321 larval brain, expression levels of synaptic proteins disc large 1 (*dlg1*) and Synapsin (*Syn*) are  
322 downregulated. *dlg1* is a member of the membrane-associated guanylate kinase (MAGUK)  
323 protein family. Several vertebrate homologs of *dlg1* have been shown to be important for  
324 learning and memory. Discs Large MAGUK Scaffold Protein 3 (*DLG3*), also called Synapse-  
325 Associated Protein 102 (*SAP-102*) knock-out mice have spatial learning deficit (Cuthbert et  
326 al., 2007) and in human *DLG3* mutations which cause dysfunctional NMDA receptor  
327 signalling have been associated with X-linked mental retardation (Tarpey et al., 2004; Zanni  
328 et al., 2010). We also found that *Da* is a direct regulator of *dlg1*, since in the adult *Drosophila*  
329 heads *Da* binds to multiple areas in *dlg1* gene and *dlg1* expression is upregulated when *da* is  
330 overexpressed. Gene coding for Discs Large MAGUK Scaffold Protein 2 (*DLG2*) also called  
331 Postsynaptic Density Protein 93 (*PSD-93*) which is a homolog of *Drosophila dlg1*, is a direct  
332 target of TCF4 (Hennig et al., 2017), which indicates that *Da* and TCF4 share at least some  
333 common mechanisms in regulating learning and memory.

334 Synapsins are presynaptic phosphoproteins that regulate synaptic output (reviewed in  
335 Diegelmann et al., 2013). There are three genes coding for vertebrate Synapsins but only  
336 one *Syn* gene in *Drosophila* (Klagges et al., 1996). Using knockout experiments in mice it  
337 has been shown that Synapsins are involved in learning and memory (Gitler et al., 2004;  
338 Silva et al., 1996) and *SYN1* has been implicated in human neurological diseases such as  
339 learning difficulties and epilepsy (Garcia et al., 2004). Likewise, *Drosophila syn<sup>97</sup>* mutant  
340 larvae have impaired appetitive associative learning (Michels et al., 2005). The fact that  
341 memory of *syn<sup>97</sup>* larvae can be rescued by expressing *Syn* in the mushroom bodies (Michels  
342 et al., 2011) is consistent with our findings that lower *Da* levels affect *Syn* expression levels  
343 and that appropriate *Da* levels in mushroom body are required for proper memory formation.  
344 This means that *Da* and *Syn*-dependent memory trace is formed in the mushroom bodies.  
345 *Syn*-dependent memory is likely formed by its phosphorylation by Protein kinase A (PKA)  
346 (Michels et al., 2011). When *Syn* is phosphorylated at its PKA/CamK I/IV (Protein kinase A/  
347 Ca<sup>2+</sup>/calmodulin-dependent protein kinase I/IV) sites its affinity for actin is reduced and  
348 synaptic vesicles from the reserve pool can be exocytosed (reviewed in Benfenati, 2011). We  
349 found that *Syn* is likely a direct target of *Da* since *Da* binds to *Syn* promoter, and both  
350 silencing and overexpression of *da* changes *Syn* levels.

351 We also sought out to rescue the learning phenotype caused by *da* silencing. For this we fed  
352 the larvae with resveratrol or SAHA. In luciferase reporter assay in primary neuronal cultures  
353 resveratrol improves transactivational capability of TCF4 significantly (unpublished data from  
354 our lab). Resveratrol inhibits cAMP-degrading phosphodiesterases which leads to elevated  
355 cAMP levels (Park et al., 2012) and TCF4-dependent transcription upon neuronal activity is



356 activated by cAMP-PKA pathway mediated phosphorylation of TCF4 (Sepp et al., 2017). It is  
357 plausible that Da could also be regulated by phosphorylation by PKA and therefore  
358 resveratrol could improve Da transactivational capability. Indeed, resveratrol had a moderate  
359 positive effect on learning and memory of the *da* knockdown larvae. Whether this effect is  
360 through cAMP-PKA pathway is yet to be verified. SAHA is a histone deacetylase inhibitor  
361 which improves learning and memory in *TCF4(+/-)* mice through the normalization of  
362 synaptic plasticity (Kennedy et al., 2016). Here we show that feeding SAHA to *Drosophila*  
363 larvae had also a moderate effect on learning.

364 We also made an attempt to rescue the impaired geotaxis of 30Y>Dcr2;*da*<sup>RNAi</sup> flies using  
365 resveratrol or SAHA, but we could not get significant improvement. We administrated the  
366 drugs in the food substrate either during development or to adult flies. Getting resveratrol or  
367 SAHA during development in the larval stage and the amount ingested by the adults is  
368 probably not enough to rescue phenotypes caused by lowered levels of Da in the adults. If  
369 administrating the drug in the food substrate during development and to adults prior to testing  
370 is insufficient, other administration methods could be used like possibly starving the adult  
371 flies to increase the amounts of drug ingested (Pandey and Nichols, 2011). In a recent study  
372 in *Drosophila melanogaster* where genes associated with autism spectrum disorders and  
373 intellectual disability were suppressed, the knockdown of Da resulted in impaired habituation  
374 (Fenckova et al., 2018). Rescuing this habituation phenotype could be also tested for  
375 improvement with drugs.

376 In conclusion, this study demonstrates that the levels of TCF4 homolog Da are important for  
377 learning and memory of *Drosophila* larvae and that Da directly regulates the expression of  
378 Syn and *dlg1*. This gives novel insights into the mechanisms of PTHS and this learning  
379 deficit model can be used for screening therapeutics for PTHS.

380

## 381 **Materials and methods**

### 382 ***Drosophila* stocks**

383 All *Drosophila* stocks and crosses were kept on malt and semolina based food with 12 h light  
384 and dark daily rhythms at 25°C with 60% humidity. *Drosophila* strains used in this study were  
385 CantonS (a gift from dr. Bertram Gerber), 201Y-Gal4 (Bloomington *Drosophila* Stock Center  
386 (BDSC #4440) and 30Y-Gal4 (BDSC #30818) (Yao Yang et al., 1995) were gifts from Mark  
387 Fortini. GMR12B08-Gal4 (BDSC #48489) (Pfeiffer et al., 2008), *elav*-Gal4 (BDSC #8760)  
388 (Luo et al., 1994), *repo*-Gal4 (BDSC #7415) (Sepp et al., 2001), UAS-*Dcr2*; *Pin*<sup>1</sup>/CyO (BDSC  
389 #24644) (Dietzl et al., 2007), UAS-nlsGFP (BDSC #4776), UAS-*da*<sup>G</sup> (BDSC #37291), *da*  
390 mutant line *da*<sup>10</sup> (BDSC #5531) (Caudy et al., 1988) from Bloomington Stock Center at  
391 Indiana University, USA. The following transgenic lines were generated in this study:  
392 3xFLAG-*da*<sup>2M4</sup> and sfGFP-*da*<sup>4M1</sup>.

393

### 394 **Endogeneous tagging of *Da* by CRISPR/Cas9**

395 The coding sequence for 3xFLAG- or sfGFP-tag was inserted to the 5' coding region of *da*  
396 gene using CRISPR-Cas9 technology. Genomic sequence around the tag was following: 5'  
397 ATGGCG**ACCA**GTG|ACGATGAGCC 3' (PAM sequence shown as bold and the cut site  
398 marked with |). For the higher mutagenesis rate a specific fruit fly line for guide RNA  
399 production was created. Partially overlapping oligonucleotides 5'-  
400 CTTCGTGCATCGGCTCATCGTCAC-3' and 5'-AACTGGACGATGAGCCGATGCAC-3',  
401 designed to target the N-terminus of *Da* protein, were cloned downstream the Polymerase III  
402 U6:2 promoter in the pCFD2-dU6:2gRNA plasmid (Addgene #49409). Transgenic flies  
403 expressing gRNA-s were created by injecting the generated plasmid into PBac{yellow<sup>+</sup>-attP-  
404 9A}VK00027 (BDSC #9744) fly strain embryos. For donor plasmid generation, pHD-3xFLAG-  
405 ScarlessDsRed (a gift from Kate O'Connor-Giles (DGRC)) or pHD-sfGFP-ScarlessDsRed (a  
406 gift from Kate O'Connor-Giles (DGRC)) and Gibson cloning was used. The following primer  
407 pairs were used for amplification of upstream and downstream homology arms:

408 upst F5 CGGCCGCGAATTCGCCCTTGGTTGTGAATCAGGTGTAGAAACA and

409 upst\_R GCCGGAACCTCCAGATCCACCACTGGTCGCCATTTTCAGCA,

410 dwns\_F TTCTGGTGGTTCAGGAGGTTACGATGAGCCGATGCACTTG and

411 dwns\_R GTTTAAACGAATTCGCCCTTAACGCCCTGGAACACCGAGG.

412 After verification, the obtained donor plasmids pHD-*da*-3xFLAG-ScarlessDsRed and pHD-  
413 *da*-sfGFP-ScarlessDsRed were injected into F<sub>1</sub> embryos from a cross between *da*-gRNA (our

414 gRNA expressing transgenic strain) and  $y^1M\{w^{+mC}=\text{nos-Cas9.P}\}ZH\text{-}2A\ w^*$  (BDSC #54591) fly  
415 strains. All embryo injections were ordered from BestGene Inc. (USA).

416 dsRed cassette was removed from selected progeny by crossing to PB transposase line  
417 *Herm\{3xP3-ECFP,atub-piggyBack10\}M10* (BDSC #32073) (Horn et al., 2003). The obtained  
418 3xFLAG-*da* and sfGFP-*da* lines were verified by sequencing.

419

#### 420 **RNA isolation and cloning**

421 RNA from 3xFLAG-*da* or sfGFP-*da* *Drosophila* embryos was isolated using RNeasy Mini Kit  
422 (Qiagen) according to the manufacturer's protocol. cDNA was synthesized using 2µg of RNA.  
423 Primer sequences for cloning were 5' ACTAGTTGAAGTCGACTGGAC 3' and 5'  
424 CCAGGTCCTCCAATTCCACC 3'. PCR products containing either 3xFLAG-*da* or sfGFP-*da*  
425 cDNA sequences were sequenced and cloned into pCDNA3.1 expression vector (Tamberg  
426 et al., 2015) using BcuI (SpeI, 10 U; Thermo Scientific) and BstII (Eco 91I, 10 U; Thermo  
427 Scientific) restriction enzymes. The pcDNA3.1 constructs encoding Da, and reporter vectors  
428 pGL4.29[luc2P/12µE5/Hygro], pGL4[hRlucP/PGK], pGL4.83[hRlucP/EF1α/Puro] have been  
429 described previously (Sepp et al., 2011; Sepp et al., 2012; Tamberg et al., 2015).

430

#### 431 **Cell culture and transfections and luciferase reporter assay**

432 Human embryonic kidney cells HEK-293 obtained from ATCC (LGC Standards GmbH,  
433 Wesel, Germany) and routinely tested for contamination were grown in MEM (Capricorn  
434 Scientific) supplemented with 10% fetal bovine serum (PAA Laboratories), 100 U/ml  
435 penicillin, and 0.1 mg/ml streptomycin (Gibco). For transfection 0.375 µg of DNA and 0.75 µg  
436 of PEI (Sigma-Aldrich) were used per well of a 48-well plate or scaled up accordingly. For  
437 cotransfections, equal amounts of pGL4.29[luc2P/12µE5/Hygro], pGL4[hRlucP/min/Hygro],  
438 and effector constructs were used. Luciferase assays were performed as described  
439 previously (Sepp et al., 2011) using Passive Lysis Buffer (Promega) and the Dual-Glo  
440 Luciferase Assay (Promega). Cells were lysed at 24 h after transfection. For data analysis,  
441 background signals from untransfected cells were subtracted and firefly luciferase signals  
442 were normalised to *Renilla* luciferase signals. The data was then log-transformed, auto-  
443 scaled, means and standard deviations were calculated and Student t-tests were performed.  
444 The data was back-transformed for graphical representation.

445

#### 446 **Protein electrophoresis and Western blotting**

447 For SDS-PAGE embryos, larvae, pupae, adult heads or larval brains were lysed in 2x SDS  
448 sample buffer. Equal amounts of protein were loaded to gel.

449 The following mouse monoclonal antibodies were obtained from the Developmental Studies  
450 Hybridoma Bank (created by the NICHD of the NIH and maintained at The University of  
451 Iowa, Department of Biology, Iowa City, IA 52242):  $\beta$ -tubulin E7 (developed by Klymkowsky,  
452 M., dilution 1:3000); Synapsin SYNORF1 3C11 (developed by Buchner, E., 1:1000); discs  
453 large 1 4F3 (developed by Goodman, C., 1:2000), elav 9F8A9 (developed by Rubin, Gerald  
454 M., 1:1000), Bruchpilot nc82 (developed by Buchner, E., 1:100).

455 Other antibodies and dilutions used: mouse anti-Da dam109-10 1:10 (a gift from C.  
456 Cronmiller), mouse anti-FLAG M2 HRP-conjugated 1:6000 (Sigma-Aldrich), goat anti-mouse  
457 IgM HRP-conjugated secondary antibody (MilliporeSigma).

458

### 459 **Immunohistochemical staining**

460 The anterior parts of 3rd instar larvae were dissected in PBS and fixed using 4%  
461 paraformaldehyde in PBS. Adult flies were first fixed in 4% paraformaldehyde in PBS and  
462 then dissected. Primary antibody labelling was performed over 72 hours on overhead rotator  
463 at 4°C in PBS with 0.5% TritonX-100. Used antibodies were as follows: mouse anti-FLAG M2  
464 1:1000 (Sigma-Aldrich) and goat anti-mouse Alexa594 1:1000 (ImmunoResearch  
465 Laboratories). Secondary antibodies were preadsorbed to wt tissues before use. Incubation  
466 with secondary antibodies was performed for 3 h on overhead rotator at room temperature in  
467 PBS with 0.1% TritonX-100. The labelled larval brains were dissected and mounted in  
468 Vectashield mounting medium (Vector Laboratories). For image collection, Zeiss LSM 510  
469 Meta confocal microscope with Pln Apo 20x/0.8 DICII objective (Carl Zeiss Microscopy) was  
470 used. Suitable layers were selected using Imaris (Bitplane Inc.) software.

471

### 472 **Appetitive associative learning assay**

473 Appetitive associative memory assay in the *Drosophila* larvae was performed as previously  
474 described (Michels et al., 2017). Shortly, the larvae were trained three times for 5 minutes on  
475 Petri dishes, where one odor - amyl acetate (AM) was presented with plain agar and the  
476 other odor – octanol (OCT) with agar containing fructose as a reward. Then the larvae were  
477 placed in the midline of a plain agar plate and given a choice between the two odors placed  
478 on separate halves of the Petri dish and after three minutes larvae were counted on each  
479 half of the Petri dish. Then reciprocal training was performed with AM and fructose and OCT  
480 with plain agar. Using data from two reciprocally trained tests the performance index (PI) was  
481 calculated  $PI = (PREF_{AM/AM+OCT} - PREF_{AM/OCT+}) / 2$ . The odors and the reward were

482 presented in four different orders to eliminate any non-specific preferences. All together 12  
483 training and test cycles were conducted per genotype, each time with new larvae, PI-s were  
484 calculated and used for statistical analysis. The PI-s were visualized as box-whisker plots,  
485 which show the median, the 10% - 90% quantiles, and the 25% - 75% quantiles. For  
486 statistical analysis inside one genotype a one-sample sign test was applied with an error  
487 threshold of smaller than 5%. For pairwise U-tests Bonferroni correction was used. SAHA  
488 was dissolved in dimethyl sulfoxide (DMSO) and same concentration of DMSO (0.1%) was  
489 used in the food substrate for a control. Resveratrol was dissolved in 96% ethanol and 1%  
490 ethanol in the food was used for the control.

491

### 492 **Chromatin immunoprecipitation**

493 Chromatin preparations were carried out as previously described (Chanas et al., 2004).  
494 Approximately 150 mg of adult heads were collected on dry ice and homogenized in buffer  
495 A1 (60 mM KCl, 15 mM NaCl, 4 mM MgCl<sub>2</sub>, 15 mM HEPES pH 7.6, 0.5% Triton X-100, 0.5  
496 mM DTT, 10 mM sodium butyrate, 1 x EDTA-free protease inhibitor cocktail (Roche)) + 1.8%  
497 formaldehyde in room temperature using first KONTES pellet pestle followed by three  
498 strokes using Dounce homogenizer with a loose pestle. Homogenate was incubated 15  
499 minutes and glycylglycylglycine was added to 225 mM followed by 5 minutes incubation. Homogenate  
500 was then centrifuged 5 minutes at 4000 g at 4°C and supernatant discarded. Pellet was  
501 washed three times with 3 ml A1 followed by a wash with 3 ml of lysis buffer (14 mM NaCl,  
502 15 mM HEPES pH 7.6, 1 mM EDTA, 0.5 mM EGTA, 1% Triton X-100, 0.5 mM DTT, 0.1%  
503 sodium deoxycholate, 0.05% SDS, 10 mM sodium butyrate, 1 x EDTA-free protease inhibitor  
504 cocktail (Roche)). Cross-linked material was resuspended in 0.5 ml of lysis buffer + 0.1%  
505 SDS and 0.5% N-lauroylsarcosine and incubated 10 minutes at 4°C on a rotator followed by  
506 sonication using SONICS VibraCell on 70% amplitude 15 seconds intervals 30 times. Cross-  
507 linked material was then rotated 10 minutes at 4°C and centrifuged 5 minutes at room  
508 temperature at maximum speed. Supernatant was transferred to a new tube and 0.5 ml of  
509 lysis buffer was added to the pellet followed by rotation and centrifugation. Supernatants  
510 were combined and centrifuged 2x10 minutes at maximum speed. Chromatin extract was  
511 transferred to Microcon DNA Fast Flow Centrifugal Filter Units (Merck Millipore) blocked with  
512 1mg/ml BSA in PBS and purified using lysis buffer. The volume of chromatin extract was  
513 brought to 1 ml using lysis buffer. Protein concentrations were determined using BCA assay  
514 (Pierce).

515 After removing equal amounts of inputs chromatin extracts were diluted 10x using dilution  
516 buffer (1% Triton X-100, 150 mM NaCl, 2 mM EDTA pH 8.0, 20 mM Tris-HCl pH 8.0, 1 x  
517 EDTA-free protease inhibitor cocktail (Roche)) and added to 50 µl of Dynabeads Protein G

518 (Invitrogen) beads that were previously incubated with 5 µg of monoclonal anti-FLAG M2  
519 antibody (Sigma-Aldrich) in 0.05% PBS Tween20 overnight. Chromatin immunoprecipitation  
520 (ChIP) was carried out overnight at 4°C. Beads with chromatin were then washed in wash  
521 buffer (1% Triton X-100, 0.1% SDS, 150 mM NaCl, 2 mM EDTA pH 8.0, 20 mM Tris-HCl pH  
522 8.0, 1 x EDTA-free protease inhibitor cocktail (Roche)) using a magnetic rack for 10 minutes  
523 three times at 4°C on a rotator followed by final wash buffer (1% Triton X-100, 0.1% SDS,  
524 500 mM NaCl, 2 mM EDTA pH 8.0, 20 mM Tris-HCl pH 8.0, 1 x EDTA-free protease  
525 inhibitor cocktail (Roche)). Chromatin was eluted using 3x50 µl of elution buffer (1% SDS,  
526 100 mM NaHCO<sub>3</sub>, 1 mM EDTA) 3x10 minutes at 37°C. The volume of inputs was brought to  
527 150 µl with elution buffer. For decrosslinking 8 µl of 5 M NaCl was added and the samples  
528 were incubated at 65°C overnight. Then 2 µl of RNase A (10 mg/ml) was added and  
529 incubated at 37°C for 30 minutes followed by incubation with 2 µl of EDTA (0.5M) and 4 µl  
530 Proteinase K (10 mg/ml) at 45°C for 30 minutes. DNA was extracted using QIAquick PCR  
531 Purification Kit (Qiagen).

532

### 533 **Quantitative PCR**

534 For RT-qPCR 15 heads were collected from 2-3 days old adult flies on dry ice. RNA was  
535 extracted using RNeasy Mini Kit (Qiagen). cDNA was synthesized with Superscript IV  
536 reverse transcriptase (Invitrogen) and oligo(dT)<sub>20</sub> primers. Quantitative PCR was performed  
537 using LightCycler 480 II (Roche) with Hot FIREPol EvaGreen qPCR Mix Plus (Solis  
538 Biodyne). Primer sequences are shown in Supplementary table 1.

539

### 540 **Negative geotaxis assay**

541 10 females and males were separated to fresh vials 48 hours before the assay to allow  
542 recovering from anesthesia. Prior to the test males and females from control and *da* silencing  
543 group were transferred to empty vials without anesthesia and closed with another upside  
544 down vial using sticky tape. The flies were knocked down three times on the table and a  
545 photo was taken after 10 seconds. The height of the vial was divided into 10 equal parts and  
546 the number of flies in each compartment was counted and average height was calculated.  
547 The experiment was repeated five times, each time with new flies. Average climbing heights  
548 were visualized using box-whisker plots, which show the median, the 10% - 90% quantiles,  
549 and the 25% - 75% quantiles. For statistical significance pairwise U-tests were used.

550



551 **Acknowledgements**

552 We thank Mark Fortini, Bertram Gerber and Claire Cronmiller for sharing fly stocks and  
553 reagents. We thank Epp Väli and Jan Erik Alliksaar for technical assistance. We are grateful  
554 to Jürgen Tuvikene, Allan-Hermann Pool, and Richard Tamme for critical comments on  
555 manuscript. Stocks obtained from the Bloomington Drosophila Stock Center (NIH  
556 P40OD018537) were used in this study. We acknowledge the Drosophila Genomics  
557 Resource Center supported by NIH grant 2P40OD010949.

558

559 **Competing interests**

560 No competing interests declared.

561

562 **Funding**

563 This study was supported by Estonian Research Council (institutional research funding  
564 IUT19-18), European Union through the European Regional Development Fund (Project No.  
565 2014-2020.4.01.15-0012) and H2020-MSCA-RISE-2016 (EU734791), Pitt Hopkins Research  
566 Foundation and Million Dollar Bike Ride Pilot Grant Program for Rare Disease Research at  
567 UPenn Orphan Disease Center (grants MDBR-16-122-PHP and MDBR-17-127-Pitt Hopkins).

568

569 **Author contributions statement**

570 Conceptualization: L.T., M.P.; Methodology: L.T., M.J., M.P.; Formal analysis: L.T., A.Sh.,  
571 C.S.K.; Investigation: L.T., M.J., K.S., A.Sh., C.S.K., M.P.; Resources: T.T.; Writing – original  
572 draft preparation: L.T.; Writing – review and editing: L.T., A.S., T.T., M.P.; Visualization: L.T.,  
573 M.P.; Supervision: L.T., A.S., M.P.; Project administration: T.T., M.P.; Funding acquisition:  
574 T.T;

575

## 576 **References**

- 577 Amiel, J., Rio, M., de Pontual, L., Redon, R., Malan, V., Boddaert, N., Plouin, P., Carter, N. P., Lyonnet,  
578 S., Munnich, A., et al. (2007). Mutations in TCF4, encoding a class I basic helix-loop-helix  
579 transcription factor, are responsible for Pitt-Hopkins syndrome, a severe epileptic  
580 encephalopathy associated with autonomic dysfunction. *Am. J. Hum. Genet.* 80, 988–993.
- 581 Andrade-Zapata, I. and Baonza, A. (2014). The bHLH factors extramacrochaetae and daughterless  
582 control cell cycle in *Drosophila* imaginal discs through the transcriptional regulation of the  
583 Cdc25 phosphatase string. *PLoS Genet.* 10, e1004233.
- 584 Aso, Y., Grübel, K., Busch, S., Friedrich, A. B., Siwanowicz, I. and Tanimoto, H. (2009). The mushroom  
585 body of adult *Drosophila* characterized by GAL4 drivers. *J. Neurogenet.* 23, 156–172.
- 586 Bardin, A. J., Perdigoto, C. N., Southall, T. D., Brand, A. H. and Schweisguth, F. (2010). Transcriptional  
587 control of stem cell maintenance in the *Drosophila* intestine. *Dev. Camb. Engl.* 137, 705–714.
- 588 Benfenati, F. (2011). Synapsins—Molecular function, development and disease. *Semin. Cell Dev. Biol.*  
589 22, 377.
- 590 Bhattacharya, A. and Baker, N. E. (2011). A network of broadly expressed HLH genes regulates tissue-  
591 specific cell fates. *Cell* 147, 881–892.
- 592 Bhattacharya, A. and Baker, N. E. (2012). The role of the bHLH protein hairy in morphogenetic furrow  
593 progression in the developing *Drosophila* eye. *PLoS One* 7, e47503.
- 594 Brand, A. H. and Perrimon, N. (1993). Targeted gene expression as a means of altering cell fates and  
595 generating dominant phenotypes. *Dev. Camb. Engl.* 118, 401–415.
- 596 Brockschmidt, A., Todt, U., Ryu, S., Hoischen, A., Landwehr, C., Birnbaum, S., Frenck, W.,  
597 Radlwimmer, B., Lichter, P., Engels, H., et al. (2007). Severe mental retardation with  
598 breathing abnormalities (Pitt-Hopkins syndrome) is caused by haploinsufficiency of the  
599 neuronal bHLH transcription factor TCF4. *Hum. Mol. Genet.* 16, 1488–1494.
- 600 Brown, N. L., Paddock, S. W., Sattler, C. A., Cronmiller, C., Thomas, B. J. and Carroll, S. B. (1996).  
601 daughterless is required for *Drosophila* photoreceptor cell determination, eye  
602 morphogenesis, and cell cycle progression. *Dev. Biol.* 179, 65–78.
- 603 Cabrera, C. V. and Alonso, M. C. (1991). Transcriptional activation by heterodimers of the achaete-  
604 scute and daughterless gene products of *Drosophila*. *EMBO J.* 10, 2965–2973.
- 605 Castanon, I., Von Stetina, S., Kass, J. and Baylies, M. K. (2001). Dimerization partners determine the  
606 activity of the Twist bHLH protein during *Drosophila* mesoderm development. *Dev. Camb.*  
607 *Engl.* 128, 3145–3159.
- 608 Caudy, M., Vässin, H., Brand, M., Tuma, R., Jan, L. Y. and Jan, Y. N. (1988). daughterless, a *Drosophila*  
609 gene essential for both neurogenesis and sex determination, has sequence similarities to  
610 myc and the achaete-scute complex. *Cell* 55, 1061–1067.
- 611 Chanas, G., Lavrov, S., Iral, F., Cavalli, G. and Maschat, F. (2004). Engrailed and polyhomeotic  
612 maintain posterior cell identity through cubitus-interruptus regulation. *Dev. Biol.* 272, 522–  
613 535.



- 614 Chen, T., Wu, Q., Zhang, Y., Lu, T., Yue, W. and Zhang, D. (2016). Tcf4 Controls Neuronal Migration of  
615 the Cerebral Cortex through Regulation of Bmp7. *Front. Mol. Neurosci.* 9, 94.
- 616 Cisse, B., Caton, M. L., Lehner, M., Maeda, T., Scheu, S., Locksley, R., Holmberg, D., Zweier, C., den  
617 Hollander, N. S., Kant, S. G., et al. (2008). Transcription factor E2-2 is an essential and specific  
618 regulator of plasmacytoid dendritic cell development. *Cell* 135, 37–48.
- 619 Cline, T. W. (1978). Two closely linked mutations in *Drosophila melanogaster* that are lethal to  
620 opposite sexes and interact with daughterless. *Genetics* 90, 683–698.
- 621 Cronmiller, C. and Cummings, C. A. (1993). The daughterless gene product in *Drosophila* is a nuclear  
622 protein that is broadly expressed throughout the organism during development. *Mech. Dev.*  
623 42, 159–169.
- 624 Crux, S., Herms, J. and Dorostkar, M. M. (2018). Tcf4 regulates dendritic spine density and  
625 morphology in the adult brain. *PLoS ONE* 13,.
- 626 Cummings, C. A. and Cronmiller, C. (1994). The daughterless gene functions together with Notch and  
627 Delta in the control of ovarian follicle development in *Drosophila*. *Dev. Camb. Engl.* 120, 381–  
628 394.
- 629 Cuthbert, P. C., Stanford, L. E., Coba, M. P., Ainge, J. A., Fink, A. E., Opazo, P., Delgado, J. Y.,  
630 Komiyama, N. H., O’Dell, T. J. and Grant, S. G. N. (2007). Synapse-Associated Protein  
631 102/dlgh3 Couples the NMDA Receptor to Specific Plasticity Pathways and Learning  
632 Strategies. *J. Neurosci. Off. J. Soc. Neurosci.* 27, 2673–2682.
- 633 Diegelmann, S., Klagges, B., Michels, B., Schleyer, M. and Gerber, B. (2013). Maggot learning and  
634 Synapsin function. *J. Exp. Biol.* 216, 939–951.
- 635 Dietzl, G., Chen, D., Schnorrer, F., Su, K.-C., Barinova, Y., Fellner, M., Gasser, B., Kinsey, K., Opiel, S.,  
636 Scheiblauer, S., et al. (2007). A genome-wide transgenic RNAi library for conditional gene  
637 inactivation in *Drosophila*. *Nature* 448, 151–156.
- 638 Ekins, S., Gerlach, J., Zorn, K. M., Antonio, B. M., Lin, Z. and Gerlach, A. (2019). Repurposing Approved  
639 Drugs as Inhibitors of Kv7.1 and Nav1.8 to Treat Pitt Hopkins Syndrome. *Pharm. Res.* 36, 137.
- 640 Fenckova, M., Asztalos, L., Cizek, P., Singgih, E. L., Blok, L. E. R., Glennon, J. C., IntHout, J., Zweier, C.,  
641 Eichler, E. E., Bernier, R., et al. (2018). Integrative Cross-species Analyses Suggest Deficits in  
642 Habituation Learning as a Widely Affected Mechanism in Intellectual Disability and Autism  
643 Spectrum Disorders. *bioRxiv* 285981.
- 644 Forrest, M. P., Waite, A. J., Martin-Rendon, E. and Blake, D. J. (2013). Knockdown of human TCF4  
645 affects multiple signaling pathways involved in cell survival, epithelial to mesenchymal  
646 transition and neuronal differentiation. *PLoS One* 8, e73169.
- 647 Forrest, M. P., Hill, M. J., Kavanagh, D. H., Tansey, K. E., Waite, A. J. and Blake, D. J. (2018). The  
648 Psychiatric Risk Gene Transcription Factor 4 (TCF4) Regulates Neurodevelopmental Pathways  
649 Associated With Schizophrenia, Autism, and Intellectual Disability. *Schizophr. Bull.* 44, 1100–  
650 1110.
- 651 Garcia, C. C., Blair, H. J., Seager, M., Coulthard, A., Tennant, S., Buddles, M., Curtis, A. and Goodship,  
652 J. A. (2004). Identification of a mutation in synapsin I, a synaptic vesicle protein, in a family  
653 with epilepsy. *J. Med. Genet.* 41, 183–186.

- 654 Giebel, B., Stüttem, I., Hinz, U. and Campos-Ortega, J. A. (1997). Lethal of Scute requires  
655 overexpression of Daughterless to elicit ectopic neuronal development during  
656 embryogenesis in *Drosophila*. *Mech. Dev.* 63, 75–87.
- 657 Gitler, D., Takagishi, Y., Feng, J., Ren, Y., Rodriguiz, R. M., Wetsel, W. C., Greengard, P. and Augustine,  
658 G. J. (2004). Different Presynaptic Roles of Synapsins at Excitatory and Inhibitory Synapses. *J.*  
659 *Neurosci.* 24, 11368–11380.
- 660 Grajkowska, L. T., Ceribelli, M., Lau, C. M., Warren, M. E., Tiniakou, I., Higa, S. N., Bunin, A., Haecker,  
661 H., Mirny, L. A., Staudt, L. M., et al. (2017). Isoform-specific expression and feedback  
662 regulation of E protein TCF4 control dendritic cell lineage specification. *Immunity* 46, 65–77.
- 663 Hennig, K. M., Fass, D. M., Zhao, W.-N., Sheridan, S. D., Fu, T., Erdin, S., Stortchevoi, A., Lucente, D.,  
664 Cody, J. D., Sweetser, D., et al. (2017). WNT/ $\beta$ -Catenin Pathway and Epigenetic Mechanisms  
665 Regulate the Pitt-Hopkins Syndrome and Schizophrenia Risk Gene TCF4. *Mol.*  
666 *Neuropsychiatry* 3, 53–71.
- 667 Hill, M. J., Killick, R., Navarrete, K., Maruszak, A., McLaughlin, G. M., Williams, B. P. and Bray, N. J.  
668 (2017). Knockdown of the schizophrenia susceptibility gene TCF4 alters gene expression and  
669 proliferation of progenitor cells from the developing human neocortex. *J. Psychiatry*  
670 *Neurosci. JPN* 42, 181–188.
- 671 Horn, C., Offen, N., Nystedt, S., Häcker, U. and Wimmer, E. A. (2003). piggyBac-based insertional  
672 mutagenesis and enhancer detection as a tool for functional insect genomics. *Genetics* 163,  
673 647–661.
- 674 Jung, M., Häberle, B. M., Tschaiakowsky, T., Wittmann, M.-T., Balta, E.-A., Stadler, V.-C., Zweier, C.,  
675 Dörfler, A., Gloeckner, C. J. and Lie, D. C. (2018). Analysis of the expression pattern of the  
676 schizophrenia-risk and intellectual disability gene TCF4 in the developing and adult brain  
677 suggests a role in development and plasticity of cortical and hippocampal neurons. *Mol.*  
678 *Autism* 9,.
- 679 Kennedy, A. J., Rahn, E. J., Paulukaitis, B. S., Savell, K. E., Kordasiewicz, H. B., Wang, J., Lewis, J. W.,  
680 Posey, J., Strange, S. K., Guzman-Karlsson, M. C., et al. (2016). Tcf4 Regulates Synaptic  
681 Plasticity, DNA Methylation, and Memory Function. *Cell Rep.* 16, 2666–2685.
- 682 Kepa, A., Medina, L. M., Erk, S., Srivastava, D. P., Fernandes, A., Toro, R., Lévi, S., Ruggeri, B.,  
683 Fernandes, C., Degenhardt, F., et al. (2017). Associations of the intellectual disability gene  
684 MYT1L with helix-loop-helix gene expression, hippocampus volume and hippocampus  
685 activation during memory retrieval. *Neuropsychopharmacol. Off. Publ. Am. Coll.*  
686 *Neuropsychopharmacol.* 42, 2516–2526.
- 687 King-Jones, K., Korge, G. and Lehmann, M. (1999). The helix-loop-helix proteins dAP-4 and  
688 daughterless bind both in vitro and in vivo to SEBP3 sites required for transcriptional  
689 activation of the *Drosophila* gene *Sgs-4*. *J. Mol. Biol.* 291, 71–82.
- 690 Klagges, B. R. E., Heimbeck, G., Godenschwege, T. A., Hofbauer, A., Pflugfelder, G. O., Reifegerste, R.,  
691 Reisch, D., Schaupp, M., Buchner, S. and Buchner, E. (1996). Invertebrate Synapsins: A Single  
692 Gene Codes for Several Isoforms in *Drosophila*. *J. Neurosci.* 16, 3154–3165.
- 693 Lennertz, L., Rujescu, D., Wagner, M., Frommann, I., Schulze-Rauschenbach, S., Schuhmacher, A.,  
694 Landsberg, M. W., Franke, P., Möller, H.-J., Wölwer, W., et al. (2011a). Novel schizophrenia

- 695 risk gene TCF4 influences verbal learning and memory functioning in schizophrenia patients.  
696 *Neuropsychobiology* 63, 131–136.
- 697 Lennertz, L., Quednow, B. B., Benninghoff, J., Wagner, M., Maier, W. and Mössner, R. (2011b). Impact  
698 of TCF4 on the genetics of schizophrenia. *Eur. Arch. Psychiatry Clin. Neurosci.* 261 Suppl 2,  
699 S161-165.
- 700 Li, K. and Baker, N. E. (2018). Regulation of the Drosophila ID protein Extra macrochaetae by  
701 proneural dimerization partners. *eLife*.
- 702 Li, H., Zhu, Y., Morozov, Y. M., Chen, X., Page, S. C., Rannals, M. D., Maher, B. J. and Rakic, P. (2019).  
703 Disruption of TCF4 regulatory networks leads to abnormal cortical development and mental  
704 disabilities. *Mol. Psychiatry*.
- 705 Luo, L., Liao, Y. J., Jan, L. Y. and Jan, Y. N. (1994). Distinct morphogenetic functions of similar small  
706 GTPases: Drosophila Drac1 is involved in axonal outgrowth and myoblast fusion. *Genes Dev.*  
707 8, 1787–1802.
- 708 MacArthur, S., Li, X.-Y., Li, J., Brown, J. B., Chu, H. C., Zeng, L., Grondona, B. P., Hechmer, A.,  
709 Simirenko, L., Keränen, S. V., et al. (2009). Developmental roles of 21 Drosophila  
710 transcription factors are determined by quantitative differences in binding to an overlapping  
711 set of thousands of genomic regions. *Genome Biol.* 10, R80.
- 712 Massari, M. E. and Murre, C. (2000). Helix-Loop-Helix Proteins: Regulators of Transcription in  
713 Eucaryotic Organisms. *Mol. Cell. Biol.* 20, 429–440.
- 714 Michels, B., Diegelmann, S., Tanimoto, H., Schwenkert, I., Buchner, E. and Gerber, B. (2005). A role  
715 for Synapsin in associative learning: The Drosophila larva as a study case. *Learn. Mem.* 12,  
716 224–231.
- 717 Michels, B., Chen, Y., Saumweber, T., Mishra, D., Tanimoto, H., Schmid, B., Engmann, O. and Gerber,  
718 B. (2011). Cellular site and molecular mode of synapsin action in associative learning. *Learn.*  
719 *Mem.* 18, 332–344.
- 720 Michels, B., Saumweber, T., Biernacki, R., Thum, J., Glasgow, R. D. V., Schleyer, M., Chen, Y.,  
721 Eschbach, C., Stocker, R. F., Toshima, N., et al. (2017). Pavlovian Conditioning of Larval  
722 Drosophila: An Illustrated, Multilingual, Hands-On Manual for Odor-Taste Associative  
723 Learning in Maggots. *Front. Behav. Neurosci.* 11,.
- 724 Murre, C., Bain, G., van Dijk, M. A., Engel, I., Furnari, B. A., Massari, M. E., Matthews, J. R., Quong, M.  
725 W., Rivera, R. R. and Stuver, M. H. (1994). Structure and function of helix-loop-helix proteins.  
726 *Biochim. Biophys. Acta* 1218, 129–135.
- 727 Page, S. C., Hamersky, G. R., Gallo, R. A., Rannals, M. D., Calcaterra, N. E., Campbell, M. N., Mayfield,  
728 B., Briley, A., Phan, B. N., Jaffe, A. E., et al. (2018). The schizophrenia- and autism-associated  
729 gene, transcription factor 4 regulates the columnar distribution of layer 2/3 prefrontal  
730 pyramidal neurons in an activity-dependent manner. *Mol. Psychiatry* 23, 304–315.
- 731 Pandey, U. B. and Nichols, C. D. (2011). Human Disease Models in Drosophila melanogaster and the  
732 Role of the Fly in Therapeutic Drug Discovery. *Pharmacol. Rev.* 63, 411–436.

- 733 Park, D., Shafer, O. T., Shepherd, S. P., Suh, H., Trigg, J. S. and Taghert, P. H. (2008). The *Drosophila*  
734 basic helix-loop-helix protein DIMMED directly activates PHM, a gene encoding a  
735 neuropeptide-amidating enzyme. *Mol. Cell. Biol.* 28, 410–421.
- 736 Park, S.-J., Ahmad, F., Philp, A., Baar, K., Williams, T., Luo, H., Ke, H., Rehmann, H., Taussig, R., Brown,  
737 A. L., et al. (2012). Resveratrol ameliorates aging-related metabolic phenotypes by inhibiting  
738 cAMP phosphodiesterases. *Cell* 148, 421–433.
- 739 Pfeiffer, B. D., Jenett, A., Hammonds, A. S., Ngo, T.-T. B., Misra, S., Murphy, C., Scully, A., Carlson, J.  
740 W., Wan, K. H., Lavery, T. R., et al. (2008). Tools for neuroanatomy and neurogenetics in  
741 *Drosophila*. *Proc. Natl. Acad. Sci. U. S. A.* 105, 9715–9720.
- 742 Powell, L. M., Deaton, A. M., Wear, M. A. and Jarman, A. P. (2008). Specificity of Atonal and Scute  
743 bHLH factors: analysis of cognate E box binding sites and the influence of Senseless. *Genes*  
744 *Cells Devoted Mol. Cell. Mech.* 13, 915–929.
- 745 Quednow, B. B., Ettinger, U., Mössner, R., Rujescu, D., Giegling, I., Collier, D. A., Schmechtig, A., Kühn,  
746 K.-U., Möller, H.-J., Maier, W., et al. (2011). The schizophrenia risk allele C of the TCF4  
747 rs9960767 polymorphism disrupts sensorimotor gating in schizophrenia spectrum and  
748 healthy volunteers. *J. Neurosci. Off. J. Soc. Neurosci.* 31, 6684–6691.
- 749 Rannals, M. D. and Maher, B. J. (2017). Molecular Mechanisms of Transcription Factor 4 in Pitt  
750 Hopkins Syndrome. *Curr. Genet. Med. Rep.* 5, 1–7.
- 751 Rannals, M. D., Page, S. C., Campbell, M. N., Gallo, R. A., Mayfield, B. and Maher, B. J. (2016).  
752 Neurodevelopmental models of transcription factor 4 deficiency converge on a common ion  
753 channel as a potential therapeutic target for Pitt Hopkins syndrome. *Rare Dis. Austin Tex* 4,  
754 e1220468.
- 755 Sepp, K. J., Schulte, J. and Auld, V. J. (2001). Peripheral glia direct axon guidance across the CNS/PNS  
756 transition zone. *Dev. Biol.* 238, 47–63.
- 757 Sepp, M., Kannike, K., Eesmaa, A., Urb, M. and Timmusk, T. (2011). Functional diversity of human  
758 basic helix-loop-helix transcription factor TCF4 isoforms generated by alternative 5' exon  
759 usage and splicing. *PLoS One* 6, e22138.
- 760 Sepp, M., Pruunsild, P. and Timmusk, T. (2012). Pitt-Hopkins syndrome-associated mutations in TCF4  
761 lead to variable impairment of the transcription factor function ranging from hypomorphic to  
762 dominant-negative effects. *Hum. Mol. Genet.* 21, 2873–2888.
- 763 Sepp, M., Vihma, H., Nurm, K., Urb, M., Page, S. C., Roots, K., Hark, A., Maher, B. J., Pruunsild, P. and  
764 Timmusk, T. (2017). The Intellectual Disability and Schizophrenia Associated Transcription  
765 Factor TCF4 Is Regulated by Neuronal Activity and Protein Kinase A. *J. Neurosci.* 37, 10516–  
766 10527.
- 767 Silva, A. J., Rosahl, T. W., Chapman, P. F., Marowitz, Z., Friedman, E., Frankland, P. W., Cestari, V.,  
768 Cioffi, D., Südhof, T. C. and Bourchouladze, R. (1996). Impaired learning in mice with  
769 abnormal short-lived plasticity. *Curr. Biol. CB* 6, 1509–1518.
- 770 Smith, J. E. and Cronmiller, C. (2001). The *Drosophila* daughterless gene autoregulates and is  
771 controlled by both positive and negative cis regulation. *Dev. Camb. Engl.* 128, 4705–4714.

- 772 Smith, J. E., Cummings, C. A. and Cronmiller, C. (2002). Daughterless coordinates somatic cell  
773 proliferation, differentiation and germline cyst survival during follicle formation in  
774 *Drosophila*. *Dev. Camb. Engl.* 129, 3255–3267.
- 775 Sun, J., Xu, A. Q., Giraud, J., Poppinga, H., Riemensperger, T., Fiala, A. and Birman, S. (2018). Neural  
776 Control of Startle-Induced Locomotion by the Mushroom Bodies and Associated Neurons in  
777 *Drosophila*. *Front. Syst. Neurosci.* 12,.
- 778 Talkowski, M. E., Rosenfeld, J. A., Blumenthal, I., Pillalamarri, V., Chiang, C., Heilbut, A., Ernst, C.,  
779 Hanscom, C., Rossin, E., Lindgren, A. M., et al. (2012). Sequencing chromosomal  
780 abnormalities reveals neurodevelopmental loci that confer risk across diagnostic boundaries.  
781 *Cell* 149, 525–537.
- 782 Tamberg, L., Sepp, M., Timmusk, T. and Palgi, M. (2015). Introducing Pitt-Hopkins syndrome-  
783 associated mutations of TCF4 to *Drosophila* daughterless. *Biol. Open* 4, 1762–1771.
- 784 Tanaka-Matakatsu, M., Miller, J., Borger, D., Tang, W.-J. and Du, W. (2014). Daughterless homodimer  
785 synergizes with Eyeless to induce Atonal expression and retinal neuron differentiation. *Dev.*  
786 *Biol.* 392, 256–265.
- 787 Tarpey, P., Parnau, J., Blow, M., Woffendin, H., Bignell, G., Cox, C., Cox, J., Davies, H., Edkins, S.,  
788 Holden, S., et al. (2004). Mutations in the DLG3 Gene Cause Nonsyndromic X-Linked Mental  
789 Retardation. *Am. J. Hum. Genet.* 75, 318–324.
- 790 Thaxton, C., Kloth, A. D., Clark, E. P., Moy, S. S., Chitwood, R. A. and Philpot, B. D. (2018). Common  
791 Pathophysiology in Multiple Mouse Models of Pitt–Hopkins Syndrome. *J. Neurosci.* 38, 918–  
792 936.
- 793 Wong, M.-C., Castanon, I. and Baylies, M. K. (2008). Daughterless dictates Twist activity in a context-  
794 dependent manner during somatic myogenesis. *Dev. Biol.* 317, 417–429.
- 795 Wu, Y., Bolduc, F. V., Bell, K., Tully, T., Fang, Y., Sehgal, A. and Fischer, J. A. (2008). A *Drosophila*  
796 model for Angelman syndrome. *Proc. Natl. Acad. Sci. U. S. A.* 105, 12399–12404.
- 797 Xia, H., Jahr, F. M., Kim, N.-K., Xie, L., Shabalina, A. A., Bryois, J., Sweet, D. H., Kronfol, M. M.,  
798 Palasuberniam, P., McRae, M., et al. (2018). Building a schizophrenia genetic network:  
799 transcription factor 4 regulates genes involved in neuronal development and schizophrenia  
800 risk. *Hum. Mol. Genet.* 27, 3246–3256.
- 801 Yao Yang, M., Armstrong, J. D., Vilinsky, I., Strausfeld, N. J. and Kaiser, K. (1995). Subdivision of the  
802 *drosophila* mushroom bodies by enhancer-trap expression patterns. *Neuron* 15, 45–54.
- 803 Yasugi, T., Fischer, A., Jiang, Y., Reichert, H. and Knoblich, J. A. (2014). A Regulatory Transcriptional  
804 Loop Controls Proliferation and Differentiation in *Drosophila* Neural Stem Cells. *PLoS ONE* 9,.
- 805 Zanni, G., van Esch, H., Bensalem, A., Saillour, Y., Poirier, K., Castelnaud, L., Ropers, H. H., de Brouwer,  
806 A. P. M., Laumonier, F., Fryns, J.-P., et al. (2010). A novel mutation in the DLG3 gene  
807 encoding the synapse-associated protein 102 (SAP102) causes non-syndromic mental  
808 retardation. *neurogenetics* 11, 251–255.
- 809 Zollino, M., Zweier, C., Balkom, I. D. V., Sweetser, D. A., Alaimo, J., Bijlsma, E. K., Cody, J., Elsea, S. H.,  
810 Giurgea, I., Macchiaiolo, M., et al. (2019). Diagnosis and management in Pitt-Hopkins  
811 syndrome: First international consensus statement. *Clin. Genet.* 95, 462–478.

812 Zweier, C., Peippo, M. M., Hoyer, J., Sousa, S., Bottani, A., Clayton-Smith, J., Reardon, W., Saraiva, J.,  
813 Cabral, A., Gohring, I., et al. (2007). Haploinsufficiency of TCF4 causes syndromal mental  
814 retardation with intermittent hyperventilation (Pitt-Hopkins syndrome). *Am. J. Hum. Genet.*  
815 80, 994–1001.

816

817

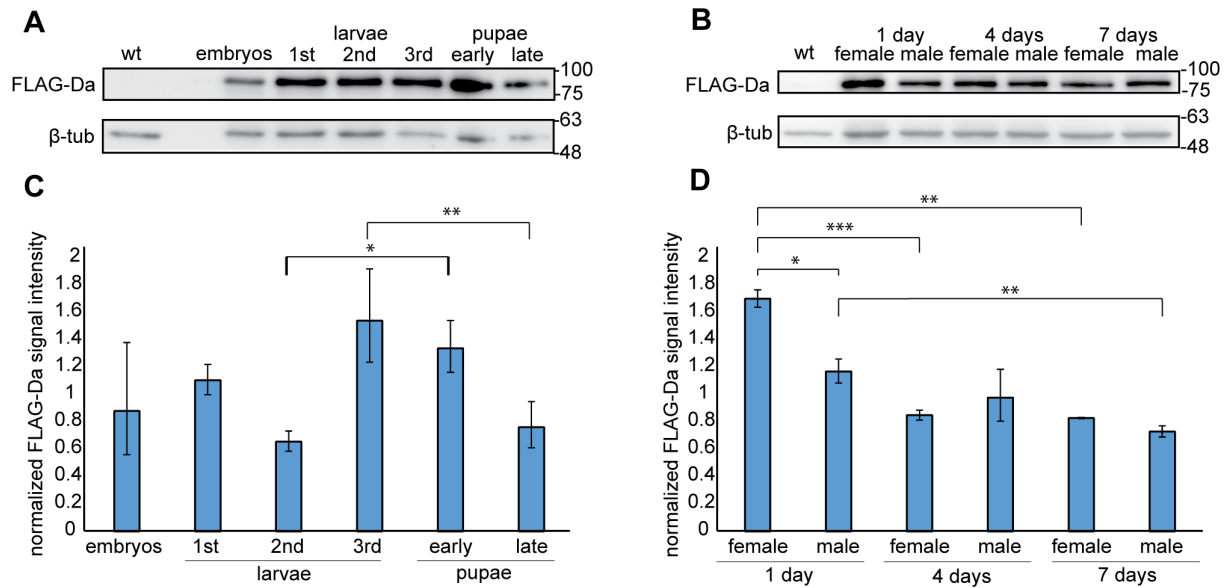

818

819

**Figure 1. Da is expressed in all developmental stages of the fruit fly.** A and B - 3xFLAG-

820

Da fusion protein is expressed throughout the fruit fly development. Western blot analysis

821

was carried out using anti-FLAG antibody,  $w^{1118}$  wild type - wt serves as negative control,

822

numbers on the right side indicate molecular weights of proteins in kDa. C and D - results of

823

densitometric analysis of Western blot, 3xFLAG-Da signals were normalized using  $\beta$ -tubulin

824

signals. The mean results from three independent Western blots are shown. Error bars show

825

standard errors. Statistical significance is shown with asterisks between the groups

826

connected with lines. \* $P < 0.05$ , \*\* $P < 0.01$ , \*\*\* $P < 0.001$ , Student t-test.

827



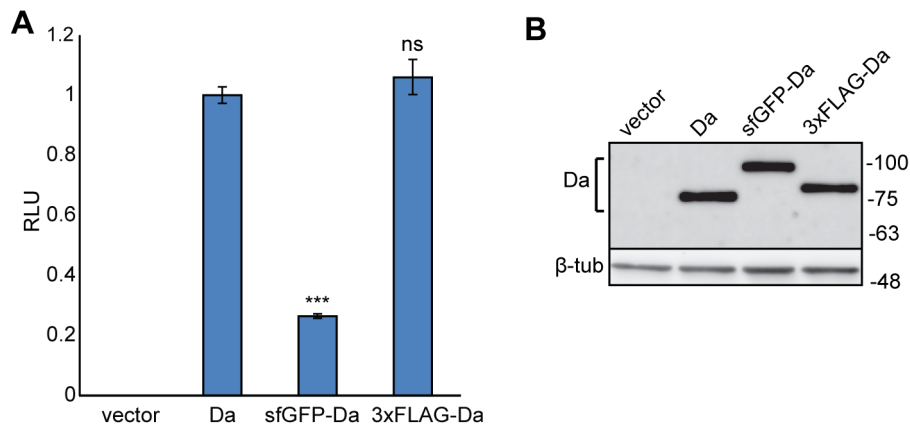

828

829 **Figure 2. Transactivational capability of Da is unaffected by N-terminal 3xFLAG tag,**  
830 **but is reduced by sfGFP tag.** A - HEK293 cells were co-transfected with constructs  
831 encoding wild type *da*, tagged *da*, or empty vector, firefly luciferase construct carrying 12  $\mu$ E5  
832 boxes with a minimal promoter, and *Renilla* luciferase construct without E-boxes for  
833 normalization. Luciferase activities were measured and data are presented as fold induced  
834 levels compared to the signals obtained from cells transfected with wild type *da* encoding  
835 construct. The mean results from six independent transfection experiments performed in  
836 duplicates are shown. Error bars show standard errors. Statistical significance is shown with  
837 asterisks relative to wt *Da* expressing cells \*\*\* $P < 0.001$ , ns - not significant, Student t-test;  
838 RLU - relative luciferase unit. B - Western blot from transfected HEK293 cells using anti-*Da*  
839 antibody dam109-10. Wild type *Da*, sfGFP- and 3xFLAG-tagged *Da* are all expressed at  
840 equal levels. Numbers on the right side indicate molecular weight of proteins in kDa.

841



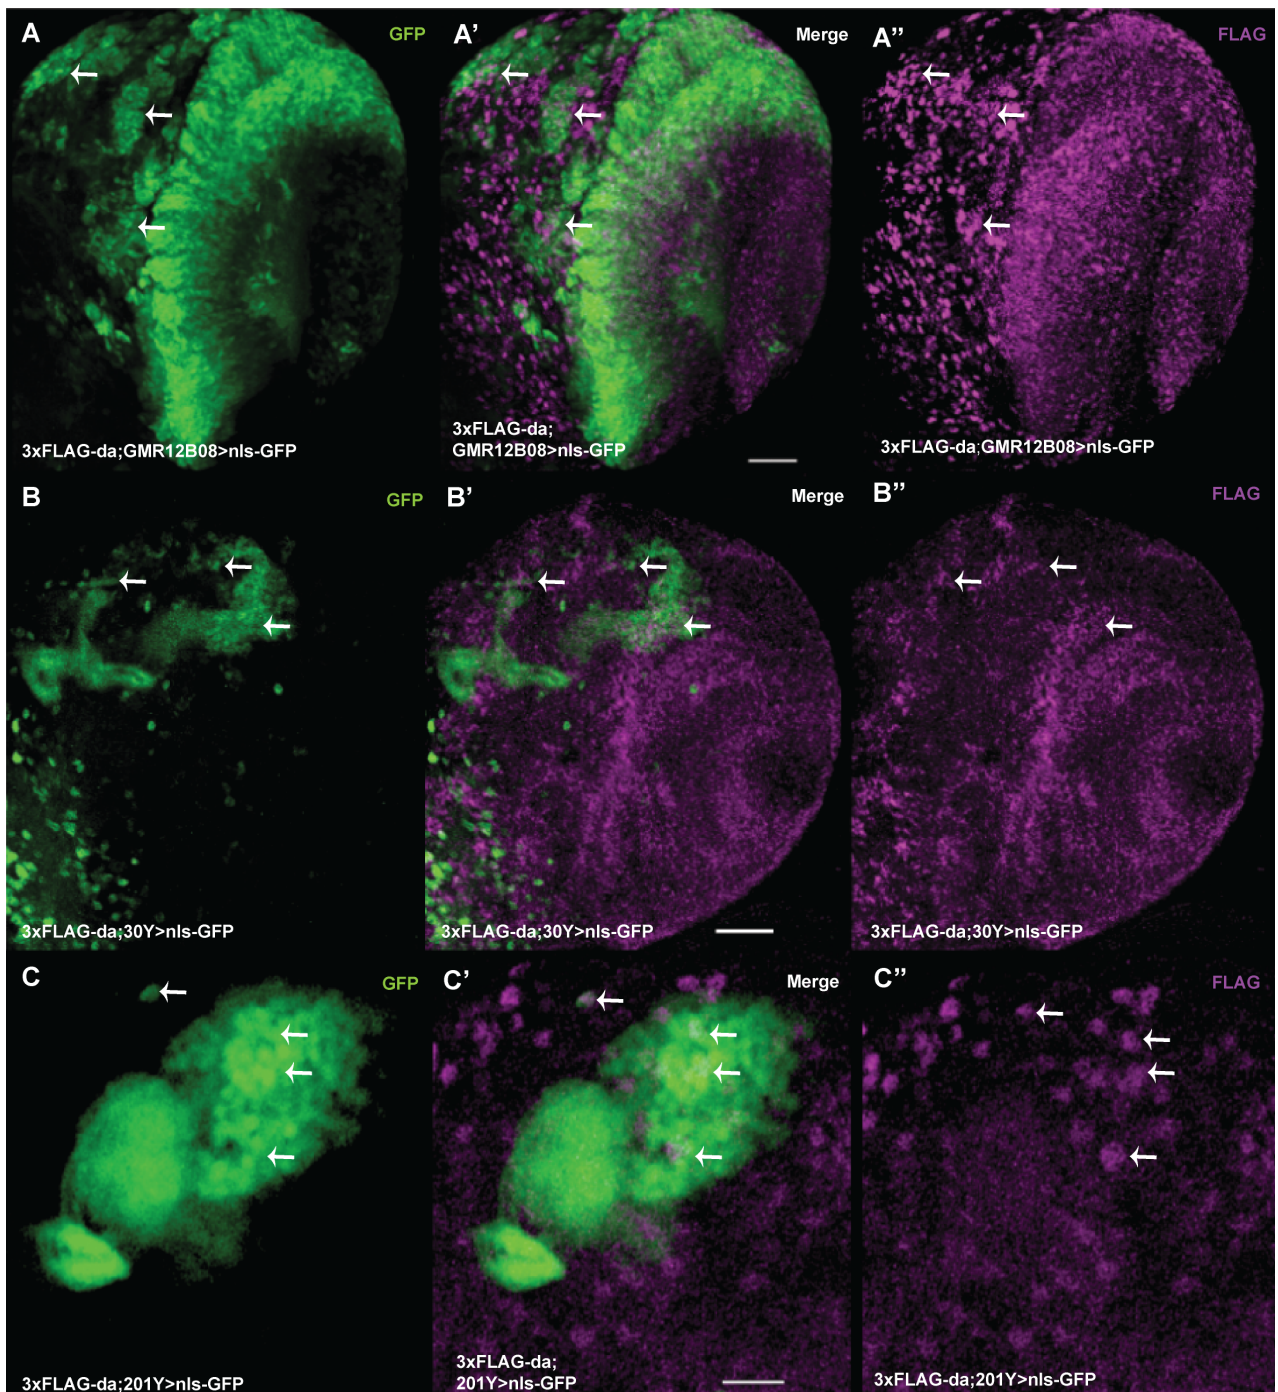

842  
843 **Figure 3. In third instar larval brain Da is expressed widely including the mushroom**  
844 **body.** Single slices of laser confocal microscopy presented. Da is coexpressed with  
845 GMR12B08-Gal4 in many areas of the larval brain lobe (A-A''). Da is expressed in the  
846 mushroom body, which is marked by nlsGFP driven by 30Y-Gal4 (B-B'') and by 201Y-Gal4  
847 (C-C''). A, B, and C - nlsGFP expression shows driver expression pattern. A'', B'' and C'' -  
848 expression of 3xFLAG-Da. Some sites of coexpression of nlsGFP and 3xFLAG-Da are  
849 shown by arrows. Scale bars on A' and B' represent 30  $\mu$ m and on C' 20  $\mu$ m.

850

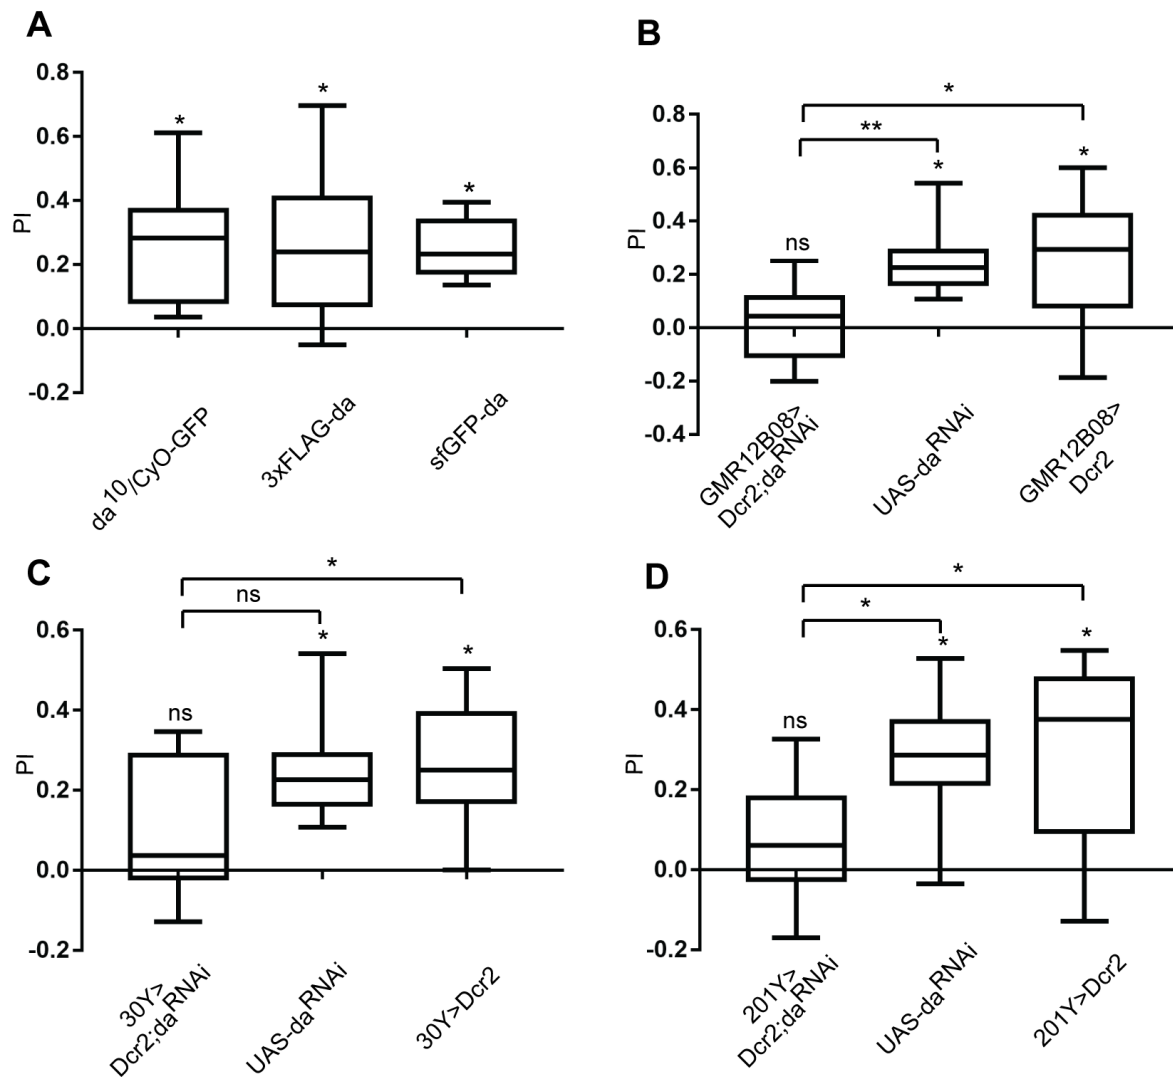

851

852 **Figure 4. Knockdown of *da* in the mushroom body leads to impaired olfactory learning**

853 **of larvae.** A - Heterozygous *da* mutation does not cause reduction of appetitive associative

854 learning, and both FLAG-*da* and GFP-*da* larvae show olfactory learning. B - Appetitive

855 associative learning was impaired when *da* was silenced using GMR12B08-Gal4, C - 30Y-

856 Gal4 and D - 201Y-Gal4. UAS-*Dcr2*, UAS-*da*<sup>RNAi</sup> and Gal4 - all were homozygous when

857 driven by GMR12B08-Gal4 (B) or 201Y-Gal4 (D). In the case of 30Y-Gal4 homozygotes

858 never emerged and the effect on learning was smaller (C). PI-s (performance index) are

859 visualized using box-whisker plots, which show the median, the 10% - 90% quantiles, and

860 the 25% - 75% quantiles. For statistical analysis one-sample sign test and Mann-Whitney U

861 test with Bonferroni correction were used. \*  $p < 0.025$ , \*\*  $p < 0.005$ .

862

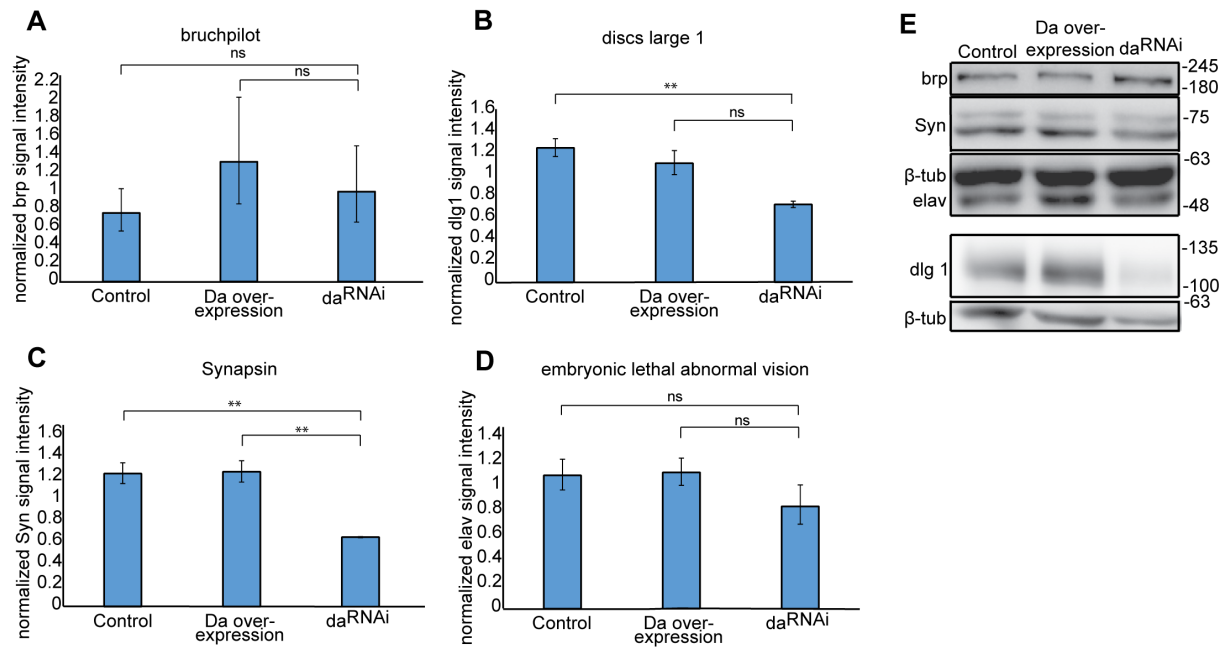

863

864 **Figure 5. Silencing of *Da* lowers expression levels of Synapsin and discs large 1.**

865 Western blot was carried out using larval brains where *da* was silenced with GMR12B08-

866 Gal4. A-D - results of densitometric analysis of Western blot, protein signals were

867 normalized using  $\beta$ -tubulin signals. The mean results from four independent Western blots

868 are shown. Error bars show standard errors. Statistical significance is shown with asterisks

869 between the groups connected with lines. \* $P < 0.05$ , \*\* $P < 0.01$ , \*\*\* $P < 0.001$ , Student t-test.

870 Overexpression of *Da* does not alter bruchpilot, discs large 1, Synapsin or embryonic lethal

871 abnormal vision levels (A-D). discs large 1 and Synapsin expression levels are lower when

872 *Da* is silenced (B and C respectively). Silencing of *Da* does not change bruchpilot and

873 embryonic lethal abnormal vision expression levels (A and D respectively). E –

874 Representative Western blot using 3rd instar larval brains. Numbers indicate molecular

875 weight of proteins in kDa. Control - GMR12B08>Dcr2 larval brains, *Da* overexpression -

876 GMR12B08>*Da* larval brains, *da*<sup>RNAi</sup> - GMR12B08>Dcr2,*da*<sup>RNAi</sup> larval brains.

877

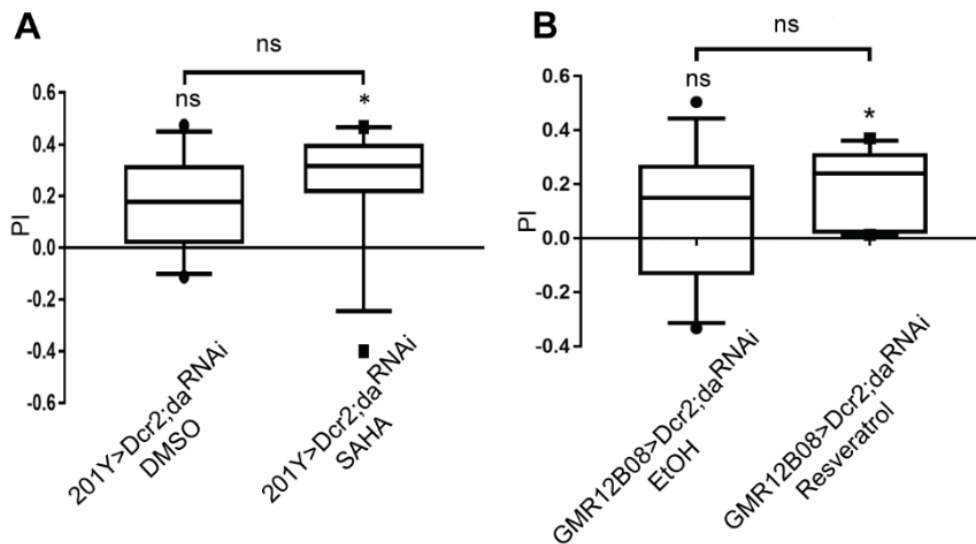

878

879 **Figure 6. Resveratrol and SAHA have moderate positive effects on rescuing the**  
880 **impaired learning phenotype resulting from decreased levels of Da.** A and B - Adding  
881 400  $\mu$ M resveratrol or 2  $\mu$ M SAHA to the larval growth media improves appetitive associative  
882 memory. PI-s are visualized using box-whisker plots, which show the median, the 10% - 90%  
883 quantiles, and the 25% - 75% quantiles. For statistical analysis one-sample sign test and  
884 Mann-Whitney U test with Bonferroni correction were used. Median PI (performance index)  
885 of these larvae are significantly different from zero so these larvae show associative memory  
886 although the PI-s are not significantly different compared to the controls.

887



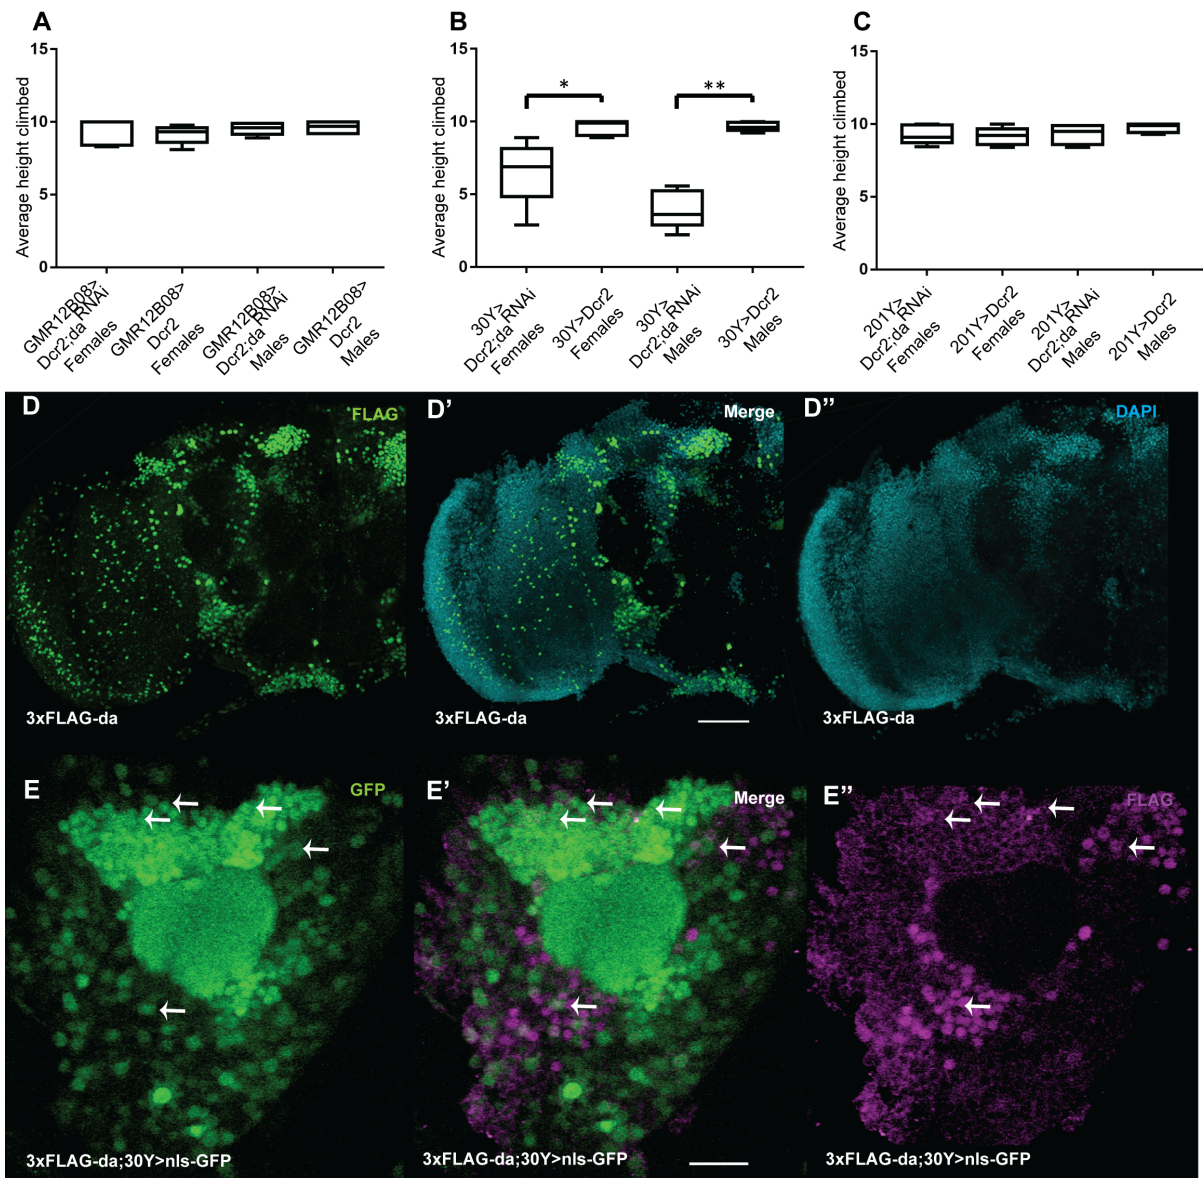

888

889 **Figure 7. Silencing of *da* with 30Y-Gal4 impairs negative geotaxis in adult flies.**

890 Negative geotaxis was not affected when *Da* was suppressed using GMR12B08-Gal4 (A) or

891 201Y-Gal4 (C). The climbing height of the flies was significantly lower when *Da* was silenced

892 using 30Y-Gal4 (B). Average climbing heights are visualized using box-whisker plots, which

893 show the median, the 10% - 90% quantiles, and the 25% - 75% quantiles. For statistical

894 significance pairwise U-tests were used. \*  $p < 0.05$ , \*\*  $p < 0.01$ . D-D'' – *Da* is expressed widely

895 in the adult *Drosophila* brain including the central brain and optic lobes. 3xFLAG-*Da* is green

896 on D and D' and nuclei are visualized using DAPI on D' and D''.

897 Scale bar represents 50  $\mu$ m (D'). E-E'' – *Da* coexpresses with 30Y-Gal4 in adult *Drosophila* mushroom body.

898 30Y-Gal4 expression is visualized with nlsGFP (E and E') and 3xFLAG-*Da* is magenta (E' and E'').

899 Some parts of coexpression is shown by arrows. Scale bar represents 15  $\mu$ m (E').

900

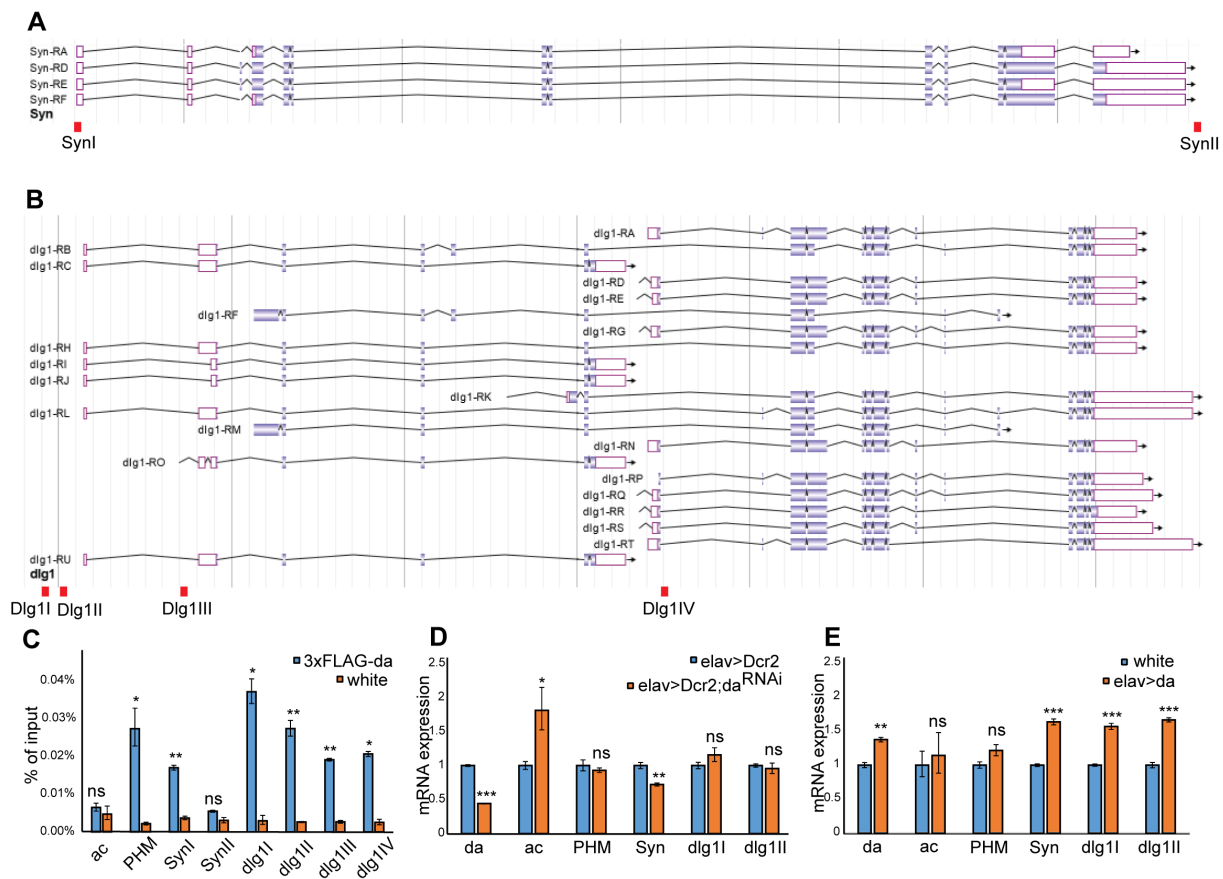

901

902 **Figure 8. *Da* directly regulates *Synapsin* and *discs large 1* in adult fly heads.** A –  
 903 JBrowse view of *Syn* gene, four annotated transcripts are shown. B – JBrowse view of *dlg1*  
 904 gene, 21 annotated transcripts are shown. Red boxes indicate areas, where primer pairs  
 905 SynI, SynII, Dlg1I, Dlg1II, Dlg1III and Dlg1IV amplify DNA. C - qPCR results from chromatin  
 906 immunoprecipitation experiment from 3xFLAG-*da* and *white*<sup>1118</sup> wild type adult heads using  
 907 anti-FLAG antibody. ac – *achaete* gene locus as a negative control; PHM - *peptidylglycine*  
 908 *alpha-hydroxylating monooxygenase* gene first intron as a positive control; SynI – promoter  
 909 region of *Synapsin*, SynII – 3' end of *Synapsin* gene locus; *dlg1I*, *dlg1II*, *dlg1III*, *dlg1IV* –  
 910 *discs large 1* gene locus. D, E – RT-qPCR results showing the effects of *da* silencing (D) or  
 911 overexpression (E) using *elav*-Gal4 on *da*, *ac*, *PHM*, *Syn* and *dlg1* mRNA levels. *da* silencing  
 912 reduces *da* and *Syn*, and increases *ac* mRNA levels (D). *da* overexpression increases *da*,  
 913 *Syn* and *dlg1* mRNA levels (E). C, D, E - Results from three biological replicates are shown,  
 914 error bars indicate standard errors. \*P<0.05, \*\*P<0.01, \*\*\*P<0.001, Student t-test.
